# Supplementary material for: Formation of quaternary centres by copper catalysed asymmetric conjugate addition to β-substituted cyclopentenones with the aid of a quantitative structure–selectivity relationship
Source: PubMed Central journal article supplement — Chem Sci. 2018 Feb 5;9(9):2628–32. doi: 10.1039/c7sc05304e (PMC5892328; doi:10.1039/c7sc05304e), 2018-02-05

## Supporting Information

### **Formation of quaternary centres by copper catalysed asymmetric conjugate addition to $\beta$ -substituted cyclopentenones with the aid of a quantitative structure-selectivity relationship**

Ruchuta Ardkhean, Mike Mortimore, Robert S. Paton\* and Stephen P. Fletcher\*

Table 1. Crystal data and structure refinement for 6790.

|                                   |                                                                                           |          |
|-----------------------------------|-------------------------------------------------------------------------------------------|----------|
| Identification code               | 6790                                                                                      |          |
| Empirical formula                 | C <sub>42.45</sub> H <sub>36.90</sub> Cl <sub>10.90</sub> N O <sub>2</sub> P <sub>1</sub> |          |
| Formula weight                    | 655.85                                                                                    |          |
| Temperature                       | 150 K                                                                                     |          |
| Wavelength                        | 1.54184 Å                                                                                 |          |
| Crystal system                    | Orthorhombic                                                                              |          |
| Space group                       | P 21 21 2                                                                                 |          |
| Unit cell dimensions              | a = 24.2085(3) Å                                                                          | α = 90°. |
|                                   | b = 16.0031(2) Å                                                                          | β = 90°. |
|                                   | c = 8.82830(10) Å                                                                         | γ = 90°. |
| Volume                            | 3420.18(7) Å <sup>3</sup>                                                                 |          |
| Z                                 | 4                                                                                         |          |
| Density (calculated)              | 1.274 Mg/m <sup>3</sup>                                                                   |          |
| Absorption coefficient            | 1.649 mm <sup>-1</sup>                                                                    |          |
| F(000)                            | 1379.412                                                                                  |          |
| Crystal size                      | 0.22 x 0.20 x 0.07 mm <sup>3</sup>                                                        |          |
| Theta range for data collection   | 3.652 to 76.378°.                                                                         |          |
| Index ranges                      | -29 ≤ h ≤ 30, -19 ≤ k ≤ 20, -11 ≤ l ≤ 7                                                   |          |
| Reflections collected             | 36120                                                                                     |          |
| Independent reflections           | 7115 [R(int) = 0.045]                                                                     |          |
| Completeness to theta = 74.850°   | 99.8 %                                                                                    |          |
| Absorption correction             | Semi-empirical from equivalents                                                           |          |
| Max. and min. transmission        | 0.89 and 0.79                                                                             |          |
| Refinement method                 | Full-matrix least-squares on F <sup>2</sup>                                               |          |
| Data / restraints / parameters    | 7115 / 0 / 438                                                                            |          |
| Goodness-of-fit on F <sup>2</sup> | 1.0024                                                                                    |          |
| Final R indices [I > 2σ(I)]       | R1 = 0.0358, wR2 = 0.0929                                                                 |          |
| R indices (all data)              | R1 = 0.0375, wR2 = 0.0949                                                                 |          |
| Absolute structure parameter      | -0.008(15)                                                                                |          |
| Largest diff. peak and hole       | 0.34 and -0.28 e.Å <sup>-3</sup>                                                          |          |

Table 2. Atomic coordinates ( $\times 10^4$ ) and equivalent isotropic displacement parameters ( $\text{\AA}^2 \times 10^3$ ) for 6790.  $U(\text{eq})$  is defined as one third of the trace of the orthogonalized  $U^{ij}$  tensor.

|       | x       | y       | z        | $U(\text{eq})$ |
|-------|---------|---------|----------|----------------|
| P(1)  | 2842(1) | 6239(1) | 6543(1)  | 30             |
| O(2)  | 2163(1) | 6445(1) | 6455(1)  | 28             |
| C(3)  | 1833(1) | 6092(1) | 7561(2)  | 26             |
| C(4)  | 1523(1) | 5374(1) | 7157(2)  | 30             |
| C(5)  | 1185(1) | 5004(1) | 8199(2)  | 32             |
| C(6)  | 1158(1) | 5316(1) | 9704(2)  | 28             |
| C(7)  | 837(1)  | 4916(1) | 10833(2) | 38             |
| C(8)  | 834(1)  | 5191(1) | 12289(3) | 44             |
| C(9)  | 1157(1) | 5886(1) | 12698(2) | 40             |
| C(10) | 1466(1) | 6298(1) | 11632(2) | 33             |
| C(11) | 1474(1) | 6033(1) | 10099(2) | 26             |
| C(12) | 1803(1) | 6448(1) | 8975(2)  | 25             |
| C(13) | 2129(1) | 7216(1) | 9296(2)  | 27             |
| C(14) | 1888(1) | 7956(1) | 9911(2)  | 33             |
| C(15) | 1315(1) | 8039(1) | 10175(3) | 43             |
| C(16) | 1110(1) | 8750(2) | 10830(4) | 68             |
| C(17) | 1464(2) | 9417(2) | 11227(4) | 82             |
| C(18) | 2009(2) | 9366(2) | 10936(3) | 66             |
| C(19) | 2236(1) | 8651(1) | 10264(2) | 45             |
| C(20) | 2804(1) | 8602(2) | 9944(2)  | 49             |
| C(21) | 3026(1) | 7918(2) | 9296(2)  | 43             |
| C(22) | 2686(1) | 7224(1) | 8961(2)  | 32             |
| O(23) | 2940(1) | 6539(1) | 8325(1)  | 35             |
| N(24) | 3043(1) | 7030(1) | 5438(2)  | 28             |
| C(25) | 3476(1) | 6868(1) | 4276(2)  | 27             |
| C(26) | 2711(1) | 7818(1) | 5285(2)  | 30             |
| C(27) | 3053(1) | 8614(1) | 5228(3)  | 46             |
| C(28) | 2321(1) | 7771(1) | 3932(2)  | 44             |
| C(29) | 3997(1) | 7391(1) | 4514(2)  | 29             |
| C(30) | 4167(1) | 7619(1) | 5934(2)  | 39             |
| C(31) | 4641(1) | 8114(1) | 6157(2)  | 44             |

|        |         |         |          |    |
|--------|---------|---------|----------|----|
| C(32)  | 4940(1) | 8380(1) | 4944(3)  | 45 |
| C(33)  | 4796(1) | 8142(1) | 3463(2)  | 36 |
| C(34)  | 5118(1) | 8391(1) | 2194(3)  | 45 |
| C(35)  | 4989(1) | 8134(2) | 771(3)   | 50 |
| C(36)  | 4527(1) | 7625(2) | 539(2)   | 46 |
| C(37)  | 4201(1) | 7373(1) | 1728(2)  | 37 |
| C(38)  | 4321(1) | 7632(1) | 3231(2)  | 30 |
| C(43)  | 3623(1) | 5936(1) | 4152(2)  | 30 |
| C(44)  | 3295(1) | 5392(1) | 3291(2)  | 35 |
| C(45)  | 3430(1) | 4543(1) | 3250(3)  | 42 |
| C(46)  | 3879(1) | 4221(1) | 4030(3)  | 43 |
| C(47)  | 4203(1) | 4764(1) | 4864(3)  | 45 |
| C(48)  | 4078(1) | 5612(1) | 4917(2)  | 38 |
| C(49)  | 2790(1) | 5688(1) | 2458(3)  | 48 |
| C(50)  | 4014(1) | 3295(2) | 3959(4)  | 64 |
| C(61)  | 5339(3) | 4647(5) | 874(9)   | 70 |
| Cl(62) | 4891(1) | 5492(1) | 1137(2)  | 65 |
| Cl(63) | 5403(1) | 4333(1) | -1001(2) | 70 |

---

Table 3. Bond lengths [ $\text{\AA}$ ] and angles [ $^\circ$ ] for 6790.

---

|              |            |              |          |
|--------------|------------|--------------|----------|
| P(1)-O(2)    | 1.6785(12) | C(19)-C(20)  | 1.406(3) |
| P(1)-O(23)   | 1.6619(14) | C(20)-C(21)  | 1.346(4) |
| P(1)-N(24)   | 1.6702(14) | C(20)-H(201) | 0.949    |
| O(2)-C(3)    | 1.3830(19) | C(21)-C(22)  | 1.414(3) |
| C(3)-C(4)    | 1.417(2)   | C(21)-H(211) | 0.940    |
| C(3)-C(12)   | 1.374(2)   | C(22)-O(23)  | 1.377(2) |
| C(4)-C(5)    | 1.366(3)   | N(24)-C(25)  | 1.490(2) |
| C(4)-H(41)   | 0.942      | N(24)-C(26)  | 1.501(2) |
| C(5)-C(6)    | 1.421(3)   | C(25)-C(29)  | 1.527(2) |
| C(5)-H(51)   | 0.931      | C(25)-C(43)  | 1.537(2) |
| C(6)-C(7)    | 1.417(2)   | C(25)-H(251) | 0.986    |
| C(6)-C(11)   | 1.422(2)   | C(26)-C(27)  | 1.520(3) |
| C(7)-C(8)    | 1.359(3)   | C(26)-C(28)  | 1.525(3) |
| C(7)-H(71)   | 0.947      | C(26)-H(261) | 0.981    |
| C(8)-C(9)    | 1.407(3)   | C(27)-H(273) | 0.958    |
| C(8)-H(81)   | 0.919      | C(27)-H(271) | 0.977    |
| C(9)-C(10)   | 1.370(2)   | C(27)-H(272) | 0.963    |
| C(9)-H(91)   | 0.944      | C(28)-H(281) | 0.944    |
| C(10)-C(11)  | 1.419(2)   | C(28)-H(282) | 0.933    |
| C(10)-H(101) | 0.917      | C(28)-H(283) | 0.972    |
| C(11)-C(12)  | 1.435(2)   | C(29)-C(30)  | 1.369(3) |
| C(12)-C(13)  | 1.489(2)   | C(29)-C(38)  | 1.431(2) |
| C(13)-C(14)  | 1.428(2)   | C(30)-C(31)  | 1.409(3) |
| C(13)-C(22)  | 1.380(2)   | C(30)-H(301) | 0.935    |
| C(14)-C(15)  | 1.412(3)   | C(31)-C(32)  | 1.361(3) |
| C(14)-C(19)  | 1.430(2)   | C(31)-H(311) | 0.939    |
| C(15)-C(16)  | 1.369(3)   | C(32)-C(33)  | 1.406(3) |
| C(15)-H(151) | 0.925      | C(32)-H(321) | 0.950    |
| C(16)-C(17)  | 1.413(4)   | C(33)-C(34)  | 1.422(3) |
| C(16)-H(161) | 0.931      | C(33)-C(38)  | 1.425(3) |
| C(17)-C(18)  | 1.346(5)   | C(34)-C(35)  | 1.357(4) |
| C(17)-H(171) | 0.943      | C(34)-H(341) | 0.927    |
| C(18)-C(19)  | 1.402(3)   | C(35)-C(36)  | 1.399(3) |
| C(18)-H(181) | 0.962      | C(35)-H(351) | 0.970    |

|                  |            |                    |            |
|------------------|------------|--------------------|------------|
| C(36)-C(37)      | 1.374(3)   | C(4)-C(5)-C(6)     | 120.33(15) |
| C(36)-H(361)     | 0.950      | C(4)-C(5)-H(51)    | 121.7      |
| C(37)-C(38)      | 1.421(3)   | C(6)-C(5)-H(51)    | 118.0      |
| C(37)-H(371)     | 0.958      | C(5)-C(6)-C(7)     | 121.60(16) |
| C(43)-C(44)      | 1.404(3)   | C(5)-C(6)-C(11)    | 119.20(15) |
| C(43)-C(48)      | 1.392(3)   | C(7)-C(6)-C(11)    | 119.18(17) |
| C(44)-C(45)      | 1.398(3)   | C(6)-C(7)-C(8)     | 121.45(17) |
| C(44)-C(49)      | 1.502(3)   | C(6)-C(7)-H(71)    | 116.8      |
| C(45)-C(46)      | 1.385(3)   | C(8)-C(7)-H(71)    | 121.7      |
| C(45)-H(451)     | 0.947      | C(7)-C(8)-C(9)     | 119.72(17) |
| C(46)-C(47)      | 1.384(3)   | C(7)-C(8)-H(81)    | 120.0      |
| C(46)-C(50)      | 1.519(3)   | C(9)-C(8)-H(81)    | 120.2      |
| C(47)-C(48)      | 1.392(3)   | C(8)-C(9)-C(10)    | 120.47(19) |
| C(47)-H(471)     | 0.932      | C(8)-C(9)-H(91)    | 120.5      |
| C(48)-H(481)     | 0.938      | C(10)-C(9)-H(91)   | 119.1      |
| C(49)-H(492)     | 0.948      | C(9)-C(10)-C(11)   | 121.31(17) |
| C(49)-H(493)     | 0.981      | C(9)-C(10)-H(101)  | 119.5      |
| C(49)-H(491)     | 0.961      | C(11)-C(10)-H(101) | 119.2      |
| C(50)-H(503)     | 0.948      | C(6)-C(11)-C(10)   | 117.84(15) |
| C(50)-H(501)     | 0.979      | C(6)-C(11)-C(12)   | 120.11(15) |
| C(50)-H(502)     | 0.955      | C(10)-C(11)-C(12)  | 122.01(15) |
| C(61)-Cl(62)     | 1.748(8)   | C(11)-C(12)-C(3)   | 117.79(14) |
| C(61)-Cl(63)     | 1.736(8)   | C(11)-C(12)-C(13)  | 122.98(14) |
| C(61)-H(611)     | 0.998      | C(3)-C(12)-C(13)   | 119.17(14) |
| C(61)-H(612)     | 0.957      | C(12)-C(13)-C(14)  | 122.68(15) |
|                  |            | C(12)-C(13)-C(22)  | 119.03(15) |
| O(2)-P(1)-O(23)  | 97.30(6)   | C(14)-C(13)-C(22)  | 118.28(16) |
| O(2)-P(1)-N(24)  | 96.26(6)   | C(13)-C(14)-C(15)  | 122.90(16) |
| O(23)-P(1)-N(24) | 107.03(7)  | C(13)-C(14)-C(19)  | 119.06(18) |
| P(1)-O(2)-C(3)   | 116.89(10) | C(15)-C(14)-C(19)  | 118.03(18) |
| O(2)-C(3)-C(4)   | 117.35(15) | C(14)-C(15)-C(16)  | 120.3(2)   |
| O(2)-C(3)-C(12)  | 120.17(14) | C(14)-C(15)-H(151) | 120.4      |
| C(4)-C(3)-C(12)  | 122.45(15) | C(16)-C(15)-H(151) | 119.3      |
| C(3)-C(4)-C(5)   | 119.90(16) | C(15)-C(16)-C(17)  | 120.8(3)   |
| C(3)-C(4)-H(41)  | 120.2      | C(15)-C(16)-H(161) | 119.9      |
| C(5)-C(4)-H(41)  | 119.9      | C(17)-C(16)-H(161) | 119.1      |

|                    |            |                     |            |
|--------------------|------------|---------------------|------------|
| C(16)-C(17)-C(18)  | 120.1(2)   | H(273)-C(27)-H(271) | 107.3      |
| C(16)-C(17)-H(171) | 119.6      | C(26)-C(27)-H(272)  | 109.3      |
| C(18)-C(17)-H(171) | 120.4      | H(273)-C(27)-H(272) | 109.5      |
| C(17)-C(18)-C(19)  | 121.1(2)   | H(271)-C(27)-H(272) | 109.3      |
| C(17)-C(18)-H(181) | 118.7      | C(26)-C(28)-H(281)  | 111.1      |
| C(19)-C(18)-H(181) | 120.2      | C(26)-C(28)-H(282)  | 111.6      |
| C(14)-C(19)-C(18)  | 119.6(2)   | H(281)-C(28)-H(282) | 107.0      |
| C(14)-C(19)-C(20)  | 119.33(19) | C(26)-C(28)-H(283)  | 108.5      |
| C(18)-C(19)-C(20)  | 121.0(2)   | H(281)-C(28)-H(283) | 108.5      |
| C(19)-C(20)-C(21)  | 121.43(18) | H(282)-C(28)-H(283) | 110.0      |
| C(19)-C(20)-H(201) | 118.4      | C(25)-C(29)-C(30)   | 121.37(16) |
| C(21)-C(20)-H(201) | 120.1      | C(25)-C(29)-C(38)   | 119.43(15) |
| C(20)-C(21)-C(22)  | 119.61(19) | C(30)-C(29)-C(38)   | 119.19(17) |
| C(20)-C(21)-H(211) | 121.7      | C(29)-C(30)-C(31)   | 121.53(19) |
| C(22)-C(21)-H(211) | 118.7      | C(29)-C(30)-H(301)  | 121.0      |
| C(21)-C(22)-C(13)  | 122.12(19) | C(31)-C(30)-H(301)  | 117.4      |
| C(21)-C(22)-O(23)  | 116.77(17) | C(30)-C(31)-C(32)   | 119.99(19) |
| C(13)-C(22)-O(23)  | 121.08(16) | C(30)-C(31)-H(311)  | 118.3      |
| C(22)-O(23)-P(1)   | 123.53(11) | C(32)-C(31)-H(311)  | 121.7      |
| P(1)-N(24)-C(25)   | 118.39(11) | C(31)-C(32)-C(33)   | 120.98(18) |
| P(1)-N(24)-C(26)   | 122.19(11) | C(31)-C(32)-H(321)  | 120.3      |
| C(25)-N(24)-C(26)  | 117.48(13) | C(33)-C(32)-H(321)  | 118.7      |
| N(24)-C(25)-C(29)  | 113.01(14) | C(32)-C(33)-C(34)   | 121.43(18) |
| N(24)-C(25)-C(43)  | 112.37(13) | C(32)-C(33)-C(38)   | 119.29(18) |
| C(29)-C(25)-C(43)  | 110.53(14) | C(34)-C(33)-C(38)   | 119.3(2)   |
| N(24)-C(25)-H(251) | 106.5      | C(33)-C(34)-C(35)   | 121.29(19) |
| C(29)-C(25)-H(251) | 106.2      | C(33)-C(34)-H(341)  | 118.1      |
| C(43)-C(25)-H(251) | 107.8      | C(35)-C(34)-H(341)  | 120.6      |
| N(24)-C(26)-C(27)  | 114.55(15) | C(34)-C(35)-C(36)   | 119.68(18) |
| N(24)-C(26)-C(28)  | 111.15(14) | C(34)-C(35)-H(351)  | 121.7      |
| C(27)-C(26)-C(28)  | 110.62(16) | C(36)-C(35)-H(351)  | 118.6      |
| N(24)-C(26)-H(261) | 104.2      | C(35)-C(36)-C(37)   | 121.2(2)   |
| C(27)-C(26)-H(261) | 107.5      | C(35)-C(36)-H(361)  | 120.0      |
| C(28)-C(26)-H(261) | 108.4      | C(37)-C(36)-H(361)  | 118.7      |
| C(26)-C(27)-H(273) | 109.0      | C(36)-C(37)-C(38)   | 120.69(19) |
| C(26)-C(27)-H(271) | 112.4      | C(36)-C(37)-H(371)  | 119.1      |

|                    |            |                     |          |
|--------------------|------------|---------------------|----------|
| C(38)-C(37)-H(371) | 120.2      | C(47)-C(48)-H(481)  | 118.3    |
| C(29)-C(38)-C(33)  | 118.91(17) | C(43)-C(48)-H(481)  | 120.5    |
| C(29)-C(38)-C(37)  | 123.26(16) | C(44)-C(49)-H(492)  | 109.9    |
| C(33)-C(38)-C(37)  | 117.81(17) | C(44)-C(49)-H(493)  | 109.4    |
| C(25)-C(43)-C(44)  | 120.62(16) | H(492)-C(49)-H(493) | 110.1    |
| C(25)-C(43)-C(48)  | 120.63(16) | C(44)-C(49)-H(491)  | 108.0    |
| C(44)-C(43)-C(48)  | 118.73(17) | H(492)-C(49)-H(491) | 109.3    |
| C(43)-C(44)-C(45)  | 118.92(18) | H(493)-C(49)-H(491) | 110.2    |
| C(43)-C(44)-C(49)  | 122.02(16) | C(46)-C(50)-H(503)  | 110.1    |
| C(45)-C(44)-C(49)  | 119.03(18) | C(46)-C(50)-H(501)  | 107.0    |
| C(44)-C(45)-C(46)  | 122.2(2)   | H(503)-C(50)-H(501) | 108.6    |
| C(44)-C(45)-H(451) | 117.9      | C(46)-C(50)-H(502)  | 113.6    |
| C(46)-C(45)-H(451) | 119.9      | H(503)-C(50)-H(502) | 107.8    |
| C(45)-C(46)-C(47)  | 118.44(18) | H(501)-C(50)-H(502) | 109.7    |
| C(45)-C(46)-C(50)  | 120.8(2)   | Cl(62)-C(61)-Cl(63) | 113.9(5) |
| C(47)-C(46)-C(50)  | 120.8(2)   | Cl(62)-C(61)-H(611) | 105.2    |
| C(46)-C(47)-C(48)  | 120.5(2)   | Cl(63)-C(61)-H(611) | 111.5    |
| C(46)-C(47)-H(471) | 120.2      | Cl(62)-C(61)-H(612) | 107.0    |
| C(48)-C(47)-H(471) | 119.2      | Cl(63)-C(61)-H(612) | 109.4    |
| C(47)-C(48)-C(43)  | 121.26(19) | H(611)-C(61)-H(612) | 109.6    |

---

Symmetry transformations used to generate equivalent atoms:



Table 4. Anisotropic displacement parameters ( $\text{\AA}^2 \times 10^3$ ) for 6790. The anisotropic displacement factor exponent takes the form:  $-2\pi^2[ h^2 a^*2U^{11} + \dots + 2 h k a^* b^* U^{12} ]$

|       | $U^{11}$ | $U^{22}$ | $U^{33}$ | $U^{23}$ | $U^{13}$ | $U^{12}$ |
|-------|----------|----------|----------|----------|----------|----------|
| P(1)  | 30(1)    | 26(1)    | 35(1)    | 8(1)     | 9(1)     | 4(1)     |
| O(2)  | 28(1)    | 27(1)    | 29(1)    | 1(1)     | 3(1)     | -2(1)    |
| C(3)  | 23(1)    | 22(1)    | 34(1)    | 1(1)     | 2(1)     | 1(1)     |
| C(4)  | 32(1)    | 21(1)    | 37(1)    | -5(1)    | 1(1)     | 1(1)     |
| C(5)  | 28(1)    | 19(1)    | 48(1)    | -3(1)    | 0(1)     | -3(1)    |
| C(6)  | 22(1)    | 22(1)    | 40(1)    | 3(1)     | 3(1)     | 1(1)     |
| C(7)  | 28(1)    | 28(1)    | 57(1)    | 4(1)     | 9(1)     | -8(1)    |
| C(8)  | 39(1)    | 41(1)    | 51(1)    | 8(1)     | 18(1)    | -7(1)    |
| C(9)  | 37(1)    | 48(1)    | 35(1)    | 2(1)     | 10(1)    | -6(1)    |
| C(10) | 30(1)    | 34(1)    | 34(1)    | 1(1)     | 5(1)     | -6(1)    |
| C(11) | 20(1)    | 25(1)    | 33(1)    | 3(1)     | 3(1)     | 0(1)     |
| C(12) | 20(1)    | 21(1)    | 33(1)    | 1(1)     | 1(1)     | -1(1)    |
| C(13) | 28(1)    | 27(1)    | 25(1)    | 2(1)     | -1(1)    | -8(1)    |
| C(14) | 42(1)    | 25(1)    | 31(1)    | -2(1)    | 3(1)     | -8(1)    |
| C(15) | 46(1)    | 27(1)    | 55(1)    | -6(1)    | 11(1)    | 0(1)     |
| C(16) | 73(2)    | 38(1)    | 94(2)    | -11(1)   | 31(2)    | 6(1)     |
| C(17) | 119(3)   | 33(1)    | 96(2)    | -27(1)   | 42(2)    | -4(1)    |
| C(18) | 108(2)   | 34(1)    | 56(1)    | -16(1)   | 19(2)    | -25(1)   |
| C(19) | 70(1)    | 35(1)    | 30(1)    | -5(1)    | 2(1)     | -19(1)   |
| C(20) | 60(1)    | 56(1)    | 32(1)    | 1(1)     | -6(1)    | -39(1)   |
| C(21) | 36(1)    | 62(1)    | 30(1)    | 6(1)     | -5(1)    | -25(1)   |
| C(22) | 30(1)    | 41(1)    | 25(1)    | 8(1)     | -3(1)    | -8(1)    |
| O(23) | 24(1)    | 47(1)    | 33(1)    | 11(1)    | 2(1)     | 4(1)     |
| N(24) | 29(1)    | 24(1)    | 30(1)    | 4(1)     | 8(1)     | 2(1)     |
| C(25) | 27(1)    | 27(1)    | 28(1)    | 2(1)     | 5(1)     | 0(1)     |
| C(26) | 33(1)    | 25(1)    | 32(1)    | 4(1)     | 6(1)     | 4(1)     |
| C(27) | 46(1)    | 25(1)    | 65(1)    | 8(1)     | 16(1)    | 3(1)     |
| C(28) | 54(1)    | 42(1)    | 36(1)    | 2(1)     | -3(1)    | 17(1)    |
| C(29) | 29(1)    | 26(1)    | 33(1)    | 2(1)     | 3(1)     | 1(1)     |
| C(30) | 37(1)    | 41(1)    | 37(1)    | 0(1)     | 0(1)     | 1(1)     |
| C(31) | 42(1)    | 46(1)    | 45(1)    | -8(1)    | -9(1)    | 0(1)     |

|        |       |       |       |        |        |        |
|--------|-------|-------|-------|--------|--------|--------|
| C(32)  | 31(1) | 38(1) | 66(1) | -2(1)  | -7(1)  | -4(1)  |
| C(33)  | 25(1) | 31(1) | 52(1) | 10(1)  | -1(1)  | 3(1)   |
| C(34)  | 24(1) | 44(1) | 68(1) | 24(1)  | 4(1)   | -1(1)  |
| C(35)  | 28(1) | 67(1) | 55(1) | 30(1)  | 12(1)  | 8(1)   |
| C(36)  | 35(1) | 67(1) | 37(1) | 14(1)  | 8(1)   | 9(1)   |
| C(37)  | 30(1) | 45(1) | 36(1) | 6(1)   | 5(1)   | 2(1)   |
| C(38)  | 25(1) | 27(1) | 38(1) | 7(1)   | 3(1)   | 2(1)   |
| C(43)  | 27(1) | 28(1) | 35(1) | 0(1)   | 8(1)   | 1(1)   |
| C(44)  | 32(1) | 31(1) | 41(1) | -5(1)  | 4(1)   | 3(1)   |
| C(45)  | 44(1) | 30(1) | 53(1) | -7(1)  | 6(1)   | 2(1)   |
| C(46)  | 41(1) | 30(1) | 57(1) | -1(1)  | 11(1)  | 7(1)   |
| C(47)  | 34(1) | 40(1) | 60(1) | 6(1)   | 2(1)   | 10(1)  |
| C(48)  | 29(1) | 35(1) | 51(1) | 2(1)   | 3(1)   | 0(1)   |
| C(49)  | 45(1) | 37(1) | 61(1) | -14(1) | -12(1) | 6(1)   |
| C(50)  | 65(2) | 35(1) | 92(2) | -4(1)  | 5(1)   | 14(1)  |
| C(61)  | 67(1) | 59(1) | 85(1) | -11(1) | 24(1)  | -24(1) |
| Cl(62) | 61(1) | 59(1) | 73(1) | -6(1)  | -1(1)  | 12(1)  |
| Cl(63) | 67(1) | 59(1) | 85(1) | -11(1) | 24(1)  | -24(1) |

---

Table 5. Hydrogen coordinates ( $\times 10^4$ ) and isotropic displacement parameters ( $\text{\AA}^2 \times 10^{-3}$ ) for 6790.

|        | x    | y    | z     | U(eq) |
|--------|------|------|-------|-------|
| H(41)  | 1550 | 5152 | 6172  | 35    |
| H(51)  | 969  | 4543 | 7956  | 38    |
| H(71)  | 631  | 4442 | 10528 | 45    |
| H(81)  | 625  | 4919 | 13006 | 52    |
| H(91)  | 1168 | 6071 | 13713 | 49    |
| H(101) | 1675 | 6750 | 11915 | 39    |
| H(151) | 1074 | 7617 | 9900  | 51    |
| H(161) | 730  | 8811 | 10960 | 82    |
| H(171) | 1315 | 9898 | 11689 | 99    |
| H(181) | 2239 | 9838 | 11168 | 80    |
| H(201) | 3032 | 9063 | 10200 | 58    |
| H(211) | 3405 | 7886 | 9068  | 52    |
| H(251) | 3321 | 7046 | 3296  | 32    |
| H(261) | 2489 | 7837 | 6214  | 34    |
| H(273) | 2809 | 9085 | 5196  | 67    |
| H(271) | 3288 | 8680 | 6119  | 66    |
| H(272) | 3279 | 8609 | 4331  | 67    |
| H(281) | 2097 | 8253 | 3871  | 65    |
| H(282) | 2514 | 7732 | 3020  | 67    |
| H(283) | 2082 | 7287 | 4057  | 65    |
| H(301) | 3969 | 7457 | 6794  | 46    |
| H(311) | 4742 | 8252 | 7153  | 53    |
| H(321) | 5254 | 8728 | 5086  | 55    |
| H(341) | 5425 | 8724 | 2366  | 54    |
| H(351) | 5213 | 8288 | -96   | 60    |
| H(361) | 4431 | 7453 | -456  | 57    |
| H(371) | 3888 | 7023 | 1529  | 43    |
| H(451) | 3200 | 4181 | 2683  | 52    |
| H(471) | 4494 | 4559 | 5450  | 54    |
| H(481) | 4304 | 5962 | 5505  | 45    |

|        |      |      |      |    |
|--------|------|------|------|----|
| H(492) | 2609 | 5229 | 2000 | 72 |
| H(493) | 2900 | 6095 | 1684 | 73 |
| H(491) | 2547 | 5945 | 3181 | 72 |
| H(503) | 4133 | 3103 | 4922 | 96 |
| H(501) | 4319 | 3230 | 3240 | 97 |
| H(502) | 3710 | 2955 | 3651 | 97 |
| H(611) | 5188 | 4190 | 1521 | 85 |
| H(612) | 5693 | 4814 | 1249 | 85 |

---

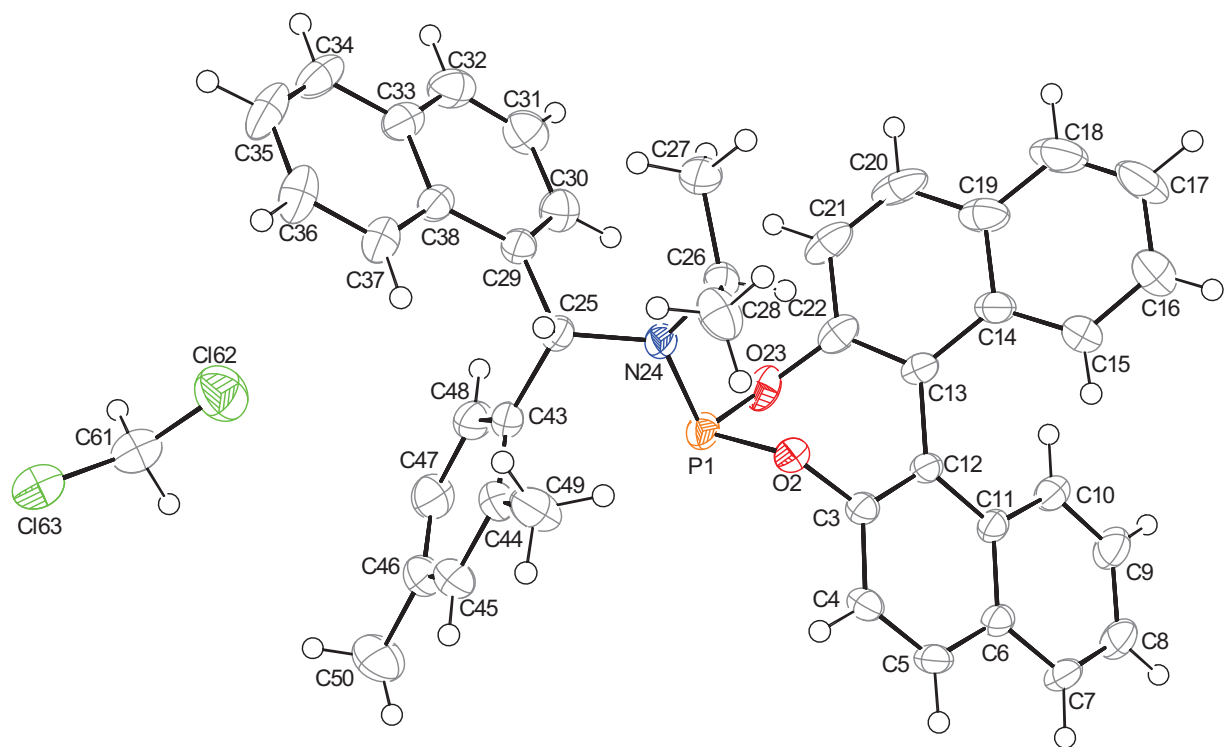

Supplement: SC-009-C7SC05304E-s004.pdf [file SC-009-C7SC05304E-s004.pdf]
