# Supplementary material for: Formation of quaternary centres by copper catalysed asymmetric conjugate addition to β-substituted cyclopentenones with the aid of a quantitative structure–selectivity relationship
Source: PubMed Central journal article supplement — Chem Sci. 2018 Feb 5;9(9):2628–32. doi: 10.1039/c7sc05304e (PMC5892328; doi:10.1039/c7sc05304e), 2018-02-05
Supplement: SC-009-C7SC05304E-s001.pdf [file SC-009-C7SC05304E-s001.pdf]

## checkCIF (full publication check) running

## checkCIF/PLATON (full publication check)

Structure factors have been supplied for datablock(s) L26-S-amine.HCl, L28-S-amine.HCl

THIS REPORT IS FOR GUIDANCE ONLY. IF USED AS PART OF A REVIEW PROCEDURE FOR PUBLICATION, IT SHOULD NOT REPLACE THE EXPERTISE OF AN EXPERIENCED CRYSTALLOGRAPHIC REFEREE.

No syntax errors found.  
Please wait while processing ....

[CIF dictionary](#)  
[Interpreting this report](#)

### Structure factor report

## Datablock: L26-S-amine.HCl

Bond precision: C-C = 0.0021 Å Wavelength=1.54184  
Cell: a=8.3320(1) b=11.3877(2) c=22.1875(4)  
alpha=90 beta=90 gamma=90

Temperature: 150 K

|                        | Calculated    | Reported       |
|------------------------|---------------|----------------|
| Volume                 | 2105.20(6)    | 2105.20(6)     |
| Space group            | P 21 21 21    | P 21 21 21     |
| Hall group             | P 2ac 2ab     | P 2ac 2ab      |
| Moiety formula         | C24 H30 N, Cl | C24 H30 Cl1 N1 |
| Sum formula            | C24 H30 Cl1 N | C24 H30 Cl1 N1 |
| Mr                     | 367.94        | 367.96         |
| Dx, g cm <sup>-3</sup> | 1.161         | 1.161          |
| Z                      | 4             | 4              |
| Mu (mm <sup>-1</sup> ) | 1.632         | 1.632          |
| F000                   | 792.0         | 792.0          |
| F000'                  | 795.22        |                |
| h, k, lmax             | 10, 14, 27    | 10, 14, 27     |
| Nref                   | 4416[ 2527]   | 4373           |
| Tmin, Tmax             | 0.806, 0.937  | 0.840, 0.940   |
| Tmin'                  | 0.710         |                |

Correction method= # Reported T Limits: Tmin=0.840 Tmax=0.940 AbsCorr = MULTI-SCAN

Data completeness= 1.73/0.99

Theta(max)= 76.114

R(reflections)= 0.0317( 4106)

wR2(reflections)= 0.0852( 4368)

S = 1.009

Npar= 309

The following ALERTS were generated. Each ALERT has the format

**test-name\_ALERT\_alert-type\_alert-level.**

Click on the hyperlinks for more details of the test.

### ● Alert level C

[PLAT220\\_ALERT\\_2\\_C](#) Non-Solvent Resd 1 C Ueq(max)/Ueq(min) Range 3.6 Ratio

[PLAT222\\_ALERT\\_3\\_C](#) Non-Solv. Resd 1 H Uiso(max)/Uiso(min) Range 5.0 Ratio

[PLAT410\\_ALERT\\_2\\_C](#) Short Intra H...H Contact H211 ..H22 . 1.98 Ang.

[PLAT922\\_ALERT\\_1\\_C](#) wR2 in the CIF and FCF Differ by ..... 0.0023 Check

### ● Alert level G

[PLAT002\\_ALERT\\_2\\_G](#) Number of Distance or Angle Restraints on AtSite 20 Note

[PLAT007\\_ALERT\\_5\\_G](#) Number of Unrefined Donor-H Atoms ..... 2 Report

[PLAT042\\_ALERT\\_1\\_G](#) Calc. and Reported MoietyFormula Strings Differ Please Check

[PLAT175\\_ALERT\\_4\\_G](#) The CIF-Embedded .res File Contains SAME Records 2 Report

[PLAT177\\_ALERT\\_4\\_G](#) The CIF-Embedded .res File Contains DELU Records 2 Report

[PLAT178\\_ALERT\\_4\\_G](#) The CIF-Embedded .res File Contains SIMU Records 2 Report

[PLAT301\\_ALERT\\_3\\_G](#) Main Residue Disorder .....(Resd 1 ) 32% Note

[PLAT720\\_ALERT\\_4\\_G](#) Number of Unusual/Non-Standard Labels ..... 8 Note

[PLAT791\\_ALERT\\_4\\_G](#) Model has Chirality at C2 (Chiral SPGR) R Verify

[PLAT811\\_ALERT\\_5\\_G](#) No ADDSYM Analysis: Too Many Excluded Atoms .... ! Info

PLAT860\_ALERT\_3\_G Number of Least-Squares Restraints ..... 452 Note  
 PLAT912\_ALERT\_4\_G Missing # of FCF Reflections Above STh/L= 0.600 10 Note  
 PLAT960\_ALERT\_3\_G Number of Intensities with I < - 2\*sig(I) ... 1 Check

0 **ALERT level A** = Most likely a serious problem - resolve or explain  
 0 **ALERT level B** = A potentially serious problem, consider carefully  
 4 **ALERT level C** = Check. Ensure it is not caused by an omission or oversight  
 13 **ALERT level G** = General information/check it is not something unexpected

2 ALERT type 1 CIF construction/syntax error, inconsistent or missing data  
 3 ALERT type 2 Indicator that the structure model may be wrong or deficient  
 4 ALERT type 3 Indicator that the structure quality may be low  
 6 ALERT type 4 Improvement, methodology, query or suggestion  
 2 ALERT type 5 Informative message, check

## Datablock: L28-S-amine.HCl

Bond precision: C-C = 0.0039 A Wavelength=1.54184  
 Cell: a=11.4023(2) b=8.4460(1) c=12.1680(2)  
 alpha=90 beta=117.387(2) gamma=90  
 Temperature: 150 K

|                | Calculated       | Reported          |
|----------------|------------------|-------------------|
| Volume         | 1040.49(3)       | 1040.49(3)        |
| Space group    | P 21             | P 21              |
| Hall group     | P 2yb            | P 2yb             |
| Moiety formula | C22 H20 F6 N, Cl | C22 H20 Cl1 F6 N1 |
| Sum formula    | C22 H20 Cl1 F6 N | C22 H20 Cl1 F6 N1 |
| Mr             | 447.84           | 447.85            |
| Dx, g cm-3     | 1.429            | 1.429             |
| Z              | 2                | 2                 |
| Mu (mm-1)      | 2.190            | 2.190             |
| F000           | 460.0            | 460.0             |
| F000'          | 462.41           |                   |
| h,k,lmax       | 14,10,15         | 14,10,15          |
| Nref           | 4373[ 2342]      | 4288              |
| Tmin,Tmax      | 0.749,0.858      | 0.710,0.860       |
| Tmin'          | 0.660            |                   |

Correction method= # Reported T Limits: Tmin=0.710 Tmax=0.860 AbsCorr =  
 MULTI-SCAN  
 Data completeness= 1.83/0.98 Theta(max)= 76.206  
 R(reflections)= 0.0357( 4200) wR2(reflections)= 0.0950( 4285)  
 S = 1.003 Npar= 345

The following ALERTS were generated. Each ALERT has the format

**test-name\_ALERT\_alert-type\_alert-level.**

Click on the hyperlinks for more details of the test.

### Alert level C

PLAT089\_ALERT\_3\_C Poor Data / Parameter Ratio (Zmax < 18) ..... 6.70 Note  
 PLAT911\_ALERT\_3\_C Missing FCF Refl Between Tmin & STh/L= 0.600 6 Report

### Alert level G

PLAT002\_ALERT\_2\_G Number of Distance or Angle Restraints on AtSite 20 Note  
 PLAT007\_ALERT\_5\_G Number of Unrefined Donor-H Atoms ..... 2 Report  
 PLAT042\_ALERT\_1\_G Calc. and Reported MoietyFormula Strings Differ Please Check  
 PLAT175\_ALERT\_4\_G The CIF-Embedded .res File Contains SAME Records 1 Report  
 PLAT177\_ALERT\_4\_G The CIF-Embedded .res File Contains DELU Records 2 Report  
 PLAT178\_ALERT\_4\_G The CIF-Embedded .res File Contains SIMU Records 2 Report  
 PLAT301\_ALERT\_3\_G Main Residue Disorder .....(Resd 1 ) 28% Note  
 PLAT432\_ALERT\_2\_G Short Inter X...Y Contact F114 ..C26 2.97 Ang.  
 PLAT791\_ALERT\_4\_G Model has Chirality at C2 (Chiral SPGR) R Verify  
 PLAT811\_ALERT\_5\_G No ADDSYM Analysis: Too Many Excluded Atoms .... ! Info  
 PLAT860\_ALERT\_3\_G Number of Least-Squares Restraints ..... 565 Note  
 PLAT912\_ALERT\_4\_G Missing # of FCF Reflections Above STh/L= 0.600 26 Note

0 **ALERT level A** = Most likely a serious problem - resolve or explain  
 0 **ALERT level B** = A potentially serious problem, consider carefully  
 2 **ALERT level C** = Check. Ensure it is not caused by an omission or oversight  
 12 **ALERT level G** = General information/check it is not something unexpected

- 1 ALERT type 1 CIF construction/syntax error, inconsistent or missing data
- 2 ALERT type 2 Indicator that the structure model may be wrong or deficient
- 4 ALERT type 3 Indicator that the structure quality may be low
- 5 ALERT type 4 Improvement, methodology, query or suggestion
- 2 ALERT type 5 Informative message, check

### Publication of your CIF

You should attempt to resolve as many as possible of the alerts in all categories. Often the minor alerts point to easily fixed oversights, errors and omissions in your CIF or refinement strategy, so attention to these fine details can be worthwhile. In order to resolve some of the more serious problems it may be necessary to carry out additional measurements or structure refinements. However, the nature of your study may justify the reported deviations from journal submission requirements and the more serious of these should be commented upon in the discussion or experimental section of a paper or in the "special\_details" fields of the CIF. *checkCIF* was carefully designed to identify outliers and unusual parameters, but every test has its limitations and alerts that are not important in a particular case may appear. Conversely, the absence of alerts does not guarantee there are no aspects of the results needing attention. It is up to the individual to critically assess their own results and, if necessary, seek expert advice.

If you wish to submit your CIF for publication in Acta Crystallographica Section C or E, you should upload your CIF via [the web](#). If you wish to submit your CIF for publication in IUCrData you should upload your CIF via [the web](#). If your CIF is to form part of a submission to another IUCr journal, you will be asked, either during electronic [submission](#) or by the Co-editor handling your paper, to upload your CIF via our web site.

PLATON version of 13/12/2017; check.def file version of 12/12/2017

### Datablock L26-S-amine.HCl - ellipsoid plot

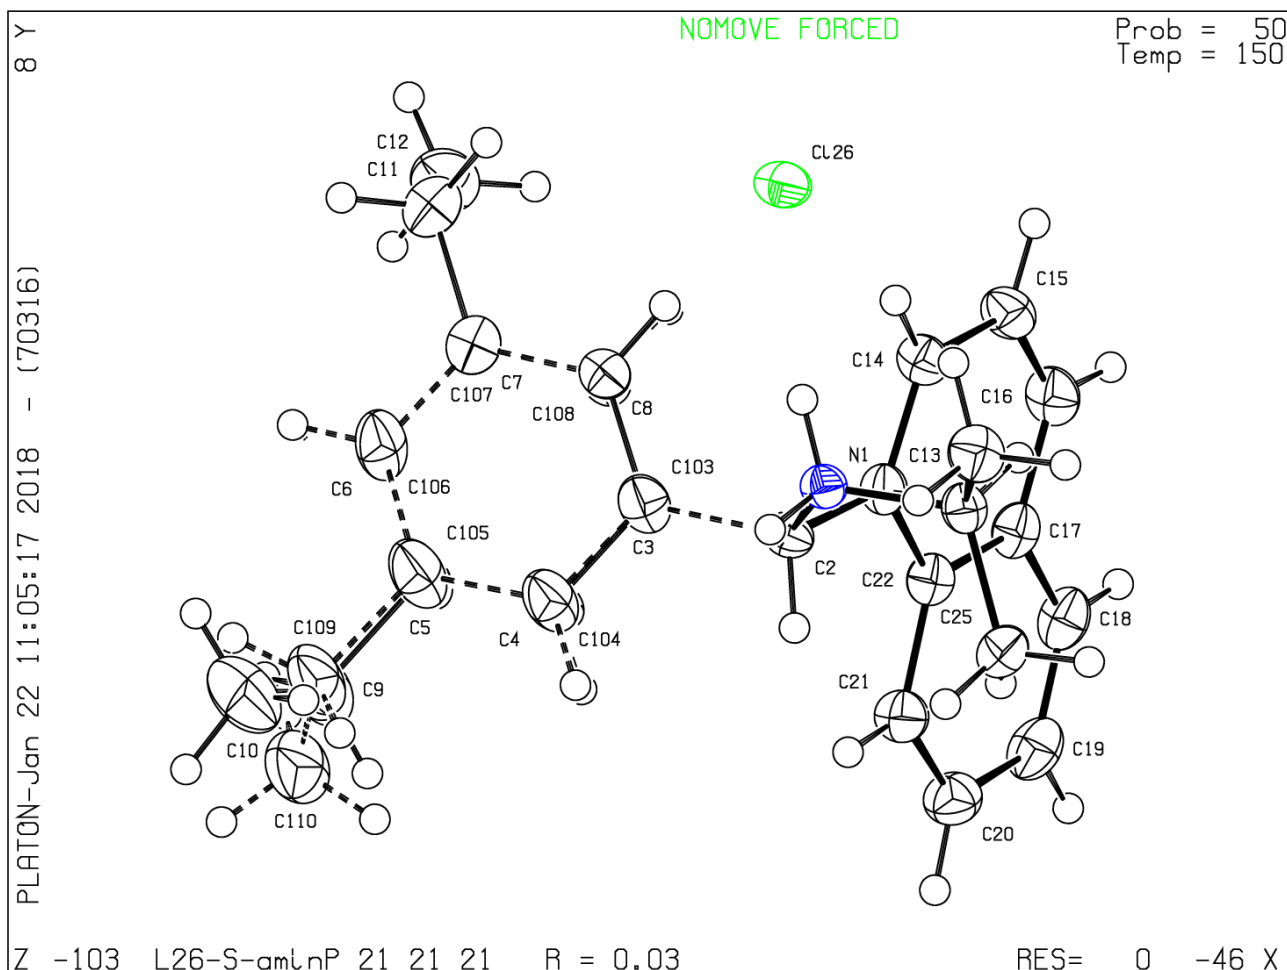

### Datablock L28-S-amine.HCl - ellipsoid plot

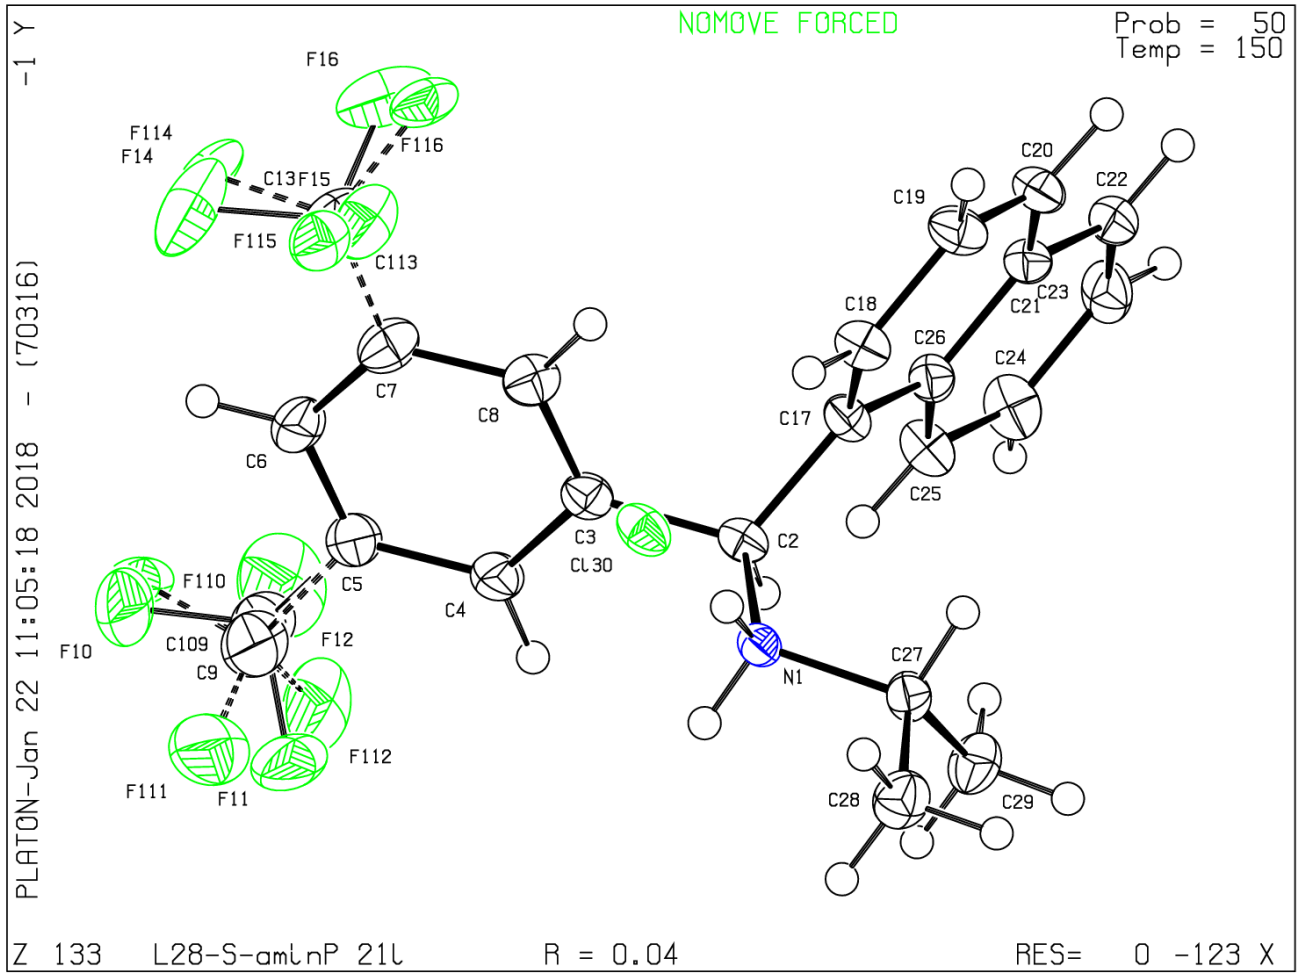

[Download CIF editor \(pubCIF\) from the IUCr](#)  
[Download CIF editor \(enCIFer\) from the CCDC](#)  
[Test a new CIF entry](#)
