# Supplementary material for: Formation of quaternary centres by copper catalysed asymmetric conjugate addition to β-substituted cyclopentenones with the aid of a quantitative structure–selectivity relationship
Source: PubMed Central journal article supplement — Chem Sci. 2018 Feb 5;9(9):2628–32. doi: 10.1039/c7sc05304e (PMC5892328; doi:10.1039/c7sc05304e), 2018-02-05
Supplement: SC-009-C7SC05304E-s003.pdf [file SC-009-C7SC05304E-s003.pdf]

## Supporting Information

### **Formation of quaternary centres by copper catalysed asymmetric conjugate addition to $\beta$ -substituted cyclopentenones with the aid of a quantitative structure-selectivity relationship**

Ruchuta Ardkhean, Mike Mortimore, Robert S. Paton\* and Stephen P. Fletcher\*

Table 1. Crystal data and structure refinement for 6797.

|                                   |                                                          |                       |
|-----------------------------------|----------------------------------------------------------|-----------------------|
| Identification code               | 6797                                                     |                       |
| Empirical formula                 | C <sub>42</sub> H <sub>36.34</sub> N O <sub>2.17</sub> P |                       |
| Formula weight                    | 620.79                                                   |                       |
| Temperature                       | 150 K                                                    |                       |
| Wavelength                        | 1.54184 Å                                                |                       |
| Crystal system                    | Orthorhombic                                             |                       |
| Space group                       | P 21 21 21                                               |                       |
| Unit cell dimensions              | a = 13.9558(3) Å                                         | $\alpha = 90^\circ$ . |
|                                   | b = 15.4622(3) Å                                         | $\beta = 90^\circ$ .  |
|                                   | c = 30.6296(6) Å                                         | $\gamma = 90^\circ$ . |
| Volume                            | 6609.5(2) Å <sup>3</sup>                                 |                       |
| Z                                 | 8                                                        |                       |
| Density (calculated)              | 1.248 Mg/m <sup>3</sup>                                  |                       |
| Absorption coefficient            | 1.030 mm <sup>-1</sup>                                   |                       |
| F(000)                            | 2621.600                                                 |                       |
| Crystal size                      | 0.31 x 0.20 x 0.09 mm <sup>3</sup>                       |                       |
| Theta range for data collection   | 3.480 to 76.542°.                                        |                       |
| Index ranges                      | -17 ≤ h ≤ 14, -19 ≤ k ≤ 18, -30 ≤ l ≤ 38                 |                       |
| Reflections collected             | 51019                                                    |                       |
| Independent reflections           | 13718 [R(int) = 0.042]                                   |                       |
| Completeness to theta = 75.011°   | 99.7 %                                                   |                       |
| Absorption correction             | Semi-empirical from equivalents                          |                       |
| Max. and min. transmission        | 0.91 and 0.82                                            |                       |
| Refinement method                 | Full-matrix least-squares on F <sup>2</sup>              |                       |
| Data / restraints / parameters    | 13717 / 0 / 888                                          |                       |
| Goodness-of-fit on F <sup>2</sup> | 0.9994                                                   |                       |
| Final R indices [I > 2σ(I)]       | R1 = 0.0323, wR2 = 0.0789                                |                       |
| R indices (all data)              | R1 = 0.0359, wR2 = 0.0822                                |                       |
| Absolute structure parameter      | 0.001(7)                                                 |                       |
| Largest diff. peak and hole       | 0.24 and -0.26 e.Å <sup>-3</sup>                         |                       |

Table 2. Atomic coordinates ( $\times 10^4$ ) and equivalent isotropic displacement parameters ( $\text{\AA}^2 \times 10^3$ ) for 6797.  $U(\text{eq})$  is defined as one third of the trace of the orthogonalized  $U^{ij}$  tensor.

|       | x        | y       | z       | $U(\text{eq})$ |
|-------|----------|---------|---------|----------------|
| P(1)  | 10013(1) | 4657(1) | 3403(1) | 21             |
| O(2)  | 9484(1)  | 4940(1) | 3871(1) | 22             |
| C(3)  | 8684(1)  | 5466(1) | 3809(1) | 21             |
| C(4)  | 8808(1)  | 6368(1) | 3831(1) | 26             |
| C(5)  | 8038(1)  | 6894(1) | 3763(1) | 29             |
| C(6)  | 7119(1)  | 6542(1) | 3671(1) | 26             |
| C(7)  | 6313(2)  | 7086(1) | 3602(1) | 35             |
| C(8)  | 5438(2)  | 6751(1) | 3504(1) | 40             |
| C(9)  | 5324(1)  | 5846(1) | 3461(1) | 38             |
| C(10) | 6086(1)  | 5304(1) | 3527(1) | 29             |
| C(11) | 7002(1)  | 5628(1) | 3644(1) | 23             |
| C(12) | 7817(1)  | 5082(1) | 3725(1) | 21             |
| C(13) | 7765(1)  | 4127(1) | 3696(1) | 21             |
| C(14) | 7104(1)  | 3628(1) | 3953(1) | 22             |
| C(15) | 6575(1)  | 4000(1) | 4301(1) | 26             |
| C(16) | 5967(1)  | 3502(1) | 4549(1) | 32             |
| C(17) | 5853(1)  | 2608(1) | 4460(1) | 34             |
| C(18) | 6364(1)  | 2235(1) | 4134(1) | 30             |
| C(19) | 7009(1)  | 2724(1) | 3875(1) | 25             |
| C(20) | 7572(1)  | 2330(1) | 3544(1) | 28             |
| C(21) | 8251(1)  | 2797(1) | 3327(1) | 28             |
| C(22) | 8373(1)  | 3685(1) | 3416(1) | 22             |
| O(23) | 9093(1)  | 4105(1) | 3190(1) | 24             |
| N(24) | 10772(1) | 3933(1) | 3605(1) | 24             |
| C(25) | 11802(1) | 4039(1) | 3506(1) | 26             |
| C(26) | 10493(1) | 3208(1) | 3896(1) | 28             |
| C(27) | 10987(1) | 3253(1) | 4341(1) | 34             |
| C(28) | 10664(2) | 2323(1) | 3693(1) | 41             |
| C(31) | 11836(2) | 2658(2) | 2458(1) | 55             |
| C(32) | 12734(2) | 2318(2) | 2464(1) | 53             |
| C(33) | 13400(2) | 2571(2) | 2791(1) | 37             |
| C(34) | 14346(2) | 2244(2) | 2793(1) | 45             |

|       |          |          |         |    |
|-------|----------|----------|---------|----|
| C(43) | 12095(1) | 4990(1)  | 3483(1) | 28 |
| C(44) | 12506(1) | 5350(1)  | 3110(1) | 34 |
| C(45) | 12797(1) | 6213(2)  | 3105(1) | 39 |
| C(46) | 12675(1) | 6705(1)  | 3477(1) | 39 |
| C(47) | 12244(1) | 6377(1)  | 3854(1) | 36 |
| C(48) | 11965(1) | 5508(1)  | 3851(1) | 32 |
| C(49) | 13226(2) | 6606(2)  | 2699(1) | 54 |
| C(50) | 12060(2) | 6944(2)  | 4245(1) | 52 |
| P(51) | 7520(1)  | -707(1)  | 3967(1) | 23 |
| O(52) | 7003(1)  | 146(1)   | 3732(1) | 22 |
| C(53) | 6218(1)  | -87(1)   | 3476(1) | 26 |
| C(54) | 6373(1)  | -244(2)  | 3026(1) | 38 |
| C(55) | 5616(2)  | -448(2)  | 2766(1) | 49 |
| C(56) | 4680(2)  | -529(2)  | 2942(1) | 41 |
| C(57) | 3881(2)  | -729(2)  | 2671(1) | 55 |
| C(58) | 2989(2)  | -828(2)  | 2842(1) | 57 |
| C(59) | 2852(2)  | -772(2)  | 3298(1) | 46 |
| C(60) | 3606(1)  | -583(1)  | 3568(1) | 35 |
| C(61) | 4536(1)  | -419(1)  | 3399(1) | 30 |
| C(62) | 5336(1)  | -170(1)  | 3668(1) | 23 |
| C(63) | 5255(1)  | -46(1)   | 4148(1) | 22 |
| C(64) | 4570(1)  | 539(1)   | 4340(1) | 24 |
| C(65) | 4021(1)  | 1124(1)  | 4083(1) | 30 |
| C(66) | 3377(1)  | 1678(1)  | 4276(1) | 39 |
| C(67) | 3242(2)  | 1674(1)  | 4730(1) | 44 |
| C(68) | 3768(1)  | 1135(1)  | 4987(1) | 40 |
| C(69) | 4455(1)  | 558(1)   | 4802(1) | 30 |
| C(70) | 5018(1)  | 2(1)     | 5064(1) | 34 |
| C(71) | 5719(1)  | -492(1)  | 4882(1) | 30 |
| C(72) | 5858(1)  | -490(1)  | 4425(1) | 24 |
| O(73) | 6584(1)  | -1015(1) | 4269(1) | 28 |
| N(74) | 8266(1)  | -201(1)  | 4301(1) | 24 |
| C(75) | 9299(1)  | -411(1)  | 4265(1) | 22 |
| C(76) | 8002(1)  | 506(1)   | 4607(1) | 27 |
| C(77) | 8517(1)  | 1352(1)  | 4503(1) | 34 |
| C(78) | 8166(2)  | 253(1)   | 5082(1) | 38 |
| C(79) | 9639(1)  | -1100(1) | 4584(1) | 23 |
| C(80) | 9036(1)  | -1705(1) | 4759(1) | 29 |

|        |           |          |          |     |
|--------|-----------|----------|----------|-----|
| C(81)  | 9356(2)   | -2295(1) | 5080(1)  | 36  |
| C(82)  | 10277(2)  | -2262(1) | 5228(1)  | 35  |
| C(83)  | 10931(1)  | -1660(1) | 5052(1)  | 29  |
| C(84)  | 11893(2)  | -1622(1) | 5198(1)  | 37  |
| C(85)  | 12519(1)  | -1038(1) | 5028(1)  | 40  |
| C(86)  | 12227(1)  | -478(1)  | 4692(1)  | 36  |
| C(87)  | 11301(1)  | -500(1)  | 4541(1)  | 29  |
| C(88)  | 10621(1)  | -1080(1) | 4720(1)  | 24  |
| C(93)  | 9594(1)   | -575(1)  | 3789(1)  | 23  |
| C(94)  | 9505(2)   | 108(1)   | 3495(1)  | 32  |
| C(95)  | 9796(2)   | 21(1)    | 3063(1)  | 37  |
| C(96)  | 10176(1)  | -767(1)  | 2928(1)  | 33  |
| C(97)  | 10249(1)  | -1466(1) | 3212(1)  | 28  |
| C(98)  | 9963(1)   | -1361(1) | 3647(1)  | 25  |
| C(99)  | 9698(3)   | 772(2)   | 2749(1)  | 62  |
| C(100) | 10630(2)  | -2320(1) | 3052(1)  | 41  |
| C(234) | 14507(17) | 2850(20) | 2688(8)  | 45  |
| C(30)  | 11537(2)  | 3230(2)  | 2794(1)  | 41  |
| C(35)  | 14995(2)  | 2499(2)  | 3099(1)  | 43  |
| C(235) | 15050(20) | 2880(20) | 3025(10) | 43  |
| C(29)  | 12147(2)  | 3471(2)  | 3123(1)  | 27  |
| C(236) | 14590(40) | 3260(40) | 3400(20) | 32  |
| C(36)  | 14732(3)  | 3115(3)  | 3417(2)  | 32  |
| C(37)  | 13811(3)  | 3432(2)  | 3425(1)  | 25  |
| C(237) | 13750(40) | 3620(30) | 3465(17) | 25  |
| C(38)  | 13112(2)  | 3174(2)  | 3119(1)  | 27  |
| C(229) | 12140(20) | 3740(20) | 3079(11) | 27  |
| C(230) | 11632(18) | 3670(20) | 2730(8)  | 41  |
| C(231) | 11981(18) | 3320(20) | 2340(8)  | 55  |
| C(232) | 12891(18) | 2990(20) | 2330(8)  | 53  |
| C(233) | 13534(15) | 3123(19) | 2686(7)  | 37  |
| C(238) | 13130(20) | 3475(18) | 3057(9)  | 27  |
| O(101) | 1931(11)  | 630(13)  | 2331(4)  | 77  |
| O(103) | 7120(20)  | 6244(13) | 1935(6)  | 114 |
| O(104) | 8140(20)  | 5750(20) | 1713(14) | 139 |

---

Table 3. Bond lengths [ $\text{\AA}$ ] and angles [ $^\circ$ ] for 6797.

---

|              |            |              |            |
|--------------|------------|--------------|------------|
| P(1)-O(2)    | 1.6709(11) | C(19)-C(20)  | 1.420(2)   |
| P(1)-O(23)   | 1.6739(12) | C(20)-C(21)  | 1.364(3)   |
| P(1)-N(24)   | 1.6601(14) | C(20)-H(201) | 0.934      |
| O(2)-C(3)    | 1.3950(19) | C(21)-C(22)  | 1.411(2)   |
| C(3)-C(4)    | 1.407(2)   | C(21)-H(211) | 0.943      |
| C(3)-C(12)   | 1.373(2)   | C(22)-O(23)  | 1.3835(19) |
| C(4)-C(5)    | 1.363(3)   | N(24)-C(25)  | 1.478(2)   |
| C(4)-H(41)   | 0.971      | N(24)-C(26)  | 1.485(2)   |
| C(5)-C(6)    | 1.422(3)   | C(25)-C(43)  | 1.528(3)   |
| C(5)-H(51)   | 0.945      | C(25)-H(251) | 0.980      |
| C(6)-C(7)    | 1.420(2)   | C(25)-C(29)  | 1.540(3)   |
| C(6)-C(11)   | 1.426(2)   | C(25)-C(43)  | 1.528(3)   |
| C(7)-C(8)    | 1.359(3)   | C(25)-H(251) | 0.980      |
| C(7)-H(71)   | 0.961      | C(25)-C(229) | 1.47(3)    |
| C(8)-C(9)    | 1.415(3)   | C(26)-C(27)  | 1.529(2)   |
| C(8)-H(81)   | 0.928      | C(26)-C(28)  | 1.523(3)   |
| C(9)-C(10)   | 1.369(3)   | C(26)-H(261) | 0.998      |
| C(9)-H(91)   | 0.951      | C(27)-H(271) | 0.976      |
| C(10)-C(11)  | 1.420(2)   | C(27)-H(272) | 0.977      |
| C(10)-H(101) | 0.965      | C(27)-H(273) | 0.970      |
| C(11)-C(12)  | 1.437(2)   | C(28)-H(283) | 0.997      |
| C(12)-C(13)  | 1.480(2)   | C(28)-H(282) | 0.984      |
| C(13)-C(14)  | 1.438(2)   | C(28)-H(281) | 0.958      |
| C(13)-C(22)  | 1.386(2)   | C(31)-C(32)  | 1.360(4)   |
| C(14)-C(15)  | 1.418(2)   | C(31)-H(311) | 0.936      |
| C(14)-C(19)  | 1.424(2)   | C(31)-C(30)  | 1.421(3)   |
| C(15)-C(16)  | 1.375(2)   | C(32)-C(33)  | 1.420(3)   |
| C(15)-H(151) | 0.924      | C(32)-H(321) | 0.951      |
| C(16)-C(17)  | 1.417(3)   | C(33)-C(34)  | 1.414(3)   |
| C(16)-H(161) | 0.940      | C(33)-C(38)  | 1.429(3)   |
| C(17)-C(18)  | 1.357(3)   | C(34)-H(341) | 0.926      |
| C(17)-H(171) | 0.925      | C(34)-C(35)  | 1.363(4)   |
| C(18)-C(19)  | 1.418(2)   | C(43)-C(44)  | 1.395(2)   |
| C(18)-H(181) | 0.924      | C(43)-C(48)  | 1.394(3)   |

|              |            |              |          |
|--------------|------------|--------------|----------|
| C(44)-C(45)  | 1.395(3)   | C(62)-C(63)  | 1.486(2) |
| C(44)-H(441) | 0.945      | C(63)-C(64)  | 1.440(2) |
| C(45)-C(46)  | 1.379(3)   | C(63)-C(72)  | 1.378(2) |
| C(45)-C(49)  | 1.509(3)   | C(64)-C(65)  | 1.422(2) |
| C(46)-C(47)  | 1.397(3)   | C(64)-C(69)  | 1.425(2) |
| C(46)-H(461) | 0.925      | C(65)-C(66)  | 1.375(3) |
| C(47)-C(48)  | 1.399(3)   | C(65)-H(651) | 0.938    |
| C(47)-C(50)  | 1.507(3)   | C(66)-C(67)  | 1.403(3) |
| C(48)-H(481) | 0.941      | C(66)-H(661) | 0.945    |
| C(49)-H(493) | 0.943      | C(67)-C(68)  | 1.361(3) |
| C(49)-H(492) | 0.960      | C(67)-H(671) | 0.949    |
| C(49)-H(491) | 0.944      | C(68)-C(69)  | 1.428(3) |
| C(50)-H(501) | 0.976      | C(68)-H(681) | 0.936    |
| C(50)-H(502) | 0.963      | C(69)-C(70)  | 1.416(3) |
| C(50)-H(503) | 0.972      | C(70)-C(71)  | 1.362(3) |
| P(51)-O(52)  | 1.6668(11) | C(70)-H(701) | 0.926    |
| P(51)-O(73)  | 1.6693(13) | C(71)-C(72)  | 1.413(2) |
| P(51)-N(74)  | 1.6555(14) | C(71)-H(711) | 0.936    |
| O(52)-C(53)  | 1.394(2)   | C(72)-O(73)  | 1.383(2) |
| C(53)-C(54)  | 1.416(2)   | N(74)-C(75)  | 1.482(2) |
| C(53)-C(62)  | 1.371(2)   | N(74)-C(76)  | 1.486(2) |
| C(54)-C(55)  | 1.362(3)   | C(75)-C(79)  | 1.522(2) |
| C(54)-H(541) | 0.947      | C(75)-C(93)  | 1.534(2) |
| C(55)-C(56)  | 1.419(3)   | C(75)-H(751) | 0.989    |
| C(55)-H(551) | 0.939      | C(76)-C(77)  | 1.526(2) |
| C(56)-C(57)  | 1.424(3)   | C(76)-C(78)  | 1.524(2) |
| C(56)-C(61)  | 1.424(2)   | C(76)-H(761) | 1.004    |
| C(57)-C(58)  | 1.360(3)   | C(77)-H(773) | 0.945    |
| C(57)-H(571) | 0.947      | C(77)-H(772) | 0.975    |
| C(58)-C(59)  | 1.410(3)   | C(77)-H(771) | 0.961    |
| C(58)-H(581) | 0.960      | C(78)-H(781) | 0.975    |
| C(59)-C(60)  | 1.371(3)   | C(78)-H(782) | 0.963    |
| C(59)-H(591) | 0.948      | C(78)-H(783) | 0.960    |
| C(60)-C(61)  | 1.420(3)   | C(79)-C(80)  | 1.368(2) |
| C(60)-H(601) | 0.925      | C(79)-C(88)  | 1.433(2) |
| C(61)-C(62)  | 1.439(2)   | C(80)-C(81)  | 1.415(3) |

|                |          |                  |            |
|----------------|----------|------------------|------------|
| C(80)-H(801)   | 0.944    | C(234)-C(235)    | 1.28(4)    |
| C(81)-C(82)    | 1.363(3) | C(234)-H(2341)   | 0.932      |
| C(81)-H(811)   | 0.932    | C(234)-C(233)    | 1.42(3)    |
| C(82)-C(83)    | 1.411(3) | C(30)-C(29)      | 1.372(4)   |
| C(82)-H(821)   | 0.958    | C(35)-C(36)      | 1.411(6)   |
| C(83)-C(84)    | 1.415(3) | C(235)-C(236)    | 1.43(7)    |
| C(83)-C(88)    | 1.424(2) | C(235)-H(2351)   | 0.932      |
| C(84)-C(85)    | 1.361(3) | C(29)-C(38)      | 1.423(3)   |
| C(84)-H(841)   | 0.948    | C(236)-C(237)    | 1.32(6)    |
| C(85)-C(86)    | 1.407(3) | C(236)-H(2361)   | 0.933      |
| C(85)-H(851)   | 0.942    | C(36)-C(37)      | 1.375(5)   |
| C(86)-C(87)    | 1.372(2) | C(37)-C(38)      | 1.411(5)   |
| C(86)-H(861)   | 0.937    | C(237)-H(2371)   | 0.934      |
| C(87)-C(88)    | 1.417(2) | C(237)-C(238)    | 1.54(6)    |
| C(87)-H(871)   | 0.959    | H(2321)-C(232)   | 0.932      |
| C(93)-C(94)    | 1.394(2) | H(2311)-C(231)   | 0.932      |
| C(93)-C(98)    | 1.389(2) | H(2301)-C(230)   | 0.929      |
| C(94)-C(95)    | 1.388(3) | C(229)-C(230)    | 1.29(4)    |
| C(94)-H(941)   | 0.957    | C(229)-C(238)    | 1.43(4)    |
| C(95)-C(96)    | 1.391(3) | C(230)-C(231)    | 1.40(3)    |
| C(95)-C(99)    | 1.515(3) | C(231)-C(232)    | 1.37(4)    |
| C(96)-C(97)    | 1.392(3) | C(232)-C(233)    | 1.43(3)    |
| C(96)-H(961)   | 0.955    | C(233)-C(238)    | 1.38(3)    |
| C(97)-C(98)    | 1.401(2) | O(101)-H(1012)   | 0.924      |
| C(97)-C(100)   | 1.505(3) | O(101)-H(1011)   | 0.950      |
| C(98)-H(981)   | 0.933    | O(103)-H(1031)   | 0.950      |
| C(99)-H(993)   | 0.961    | O(103)-H(1032)   | 0.950      |
| C(99)-H(992)   | 0.989    | O(104)-H(1041)   | 0.950      |
| C(99)-H(991)   | 0.978    | O(104)-H(1042)   | 0.950      |
| C(100)-H(1003) | 0.973    |                  |            |
| C(100)-H(1002) | 0.953    | O(2)-P(1)-O(23)  | 97.44(6)   |
| C(100)-H(1001) | 0.945    | O(2)-P(1)-N(24)  | 97.95(6)   |
| H(301)-C(30)   | 0.939    | O(23)-P(1)-N(24) | 106.94(7)  |
| H(351)-C(35)   | 0.944    | P(1)-O(2)-C(3)   | 112.90(9)  |
| H(361)-C(36)   | 0.940    | O(2)-C(3)-C(4)   | 118.25(14) |
| H(371)-C(37)   | 0.961    | O(2)-C(3)-C(12)  | 118.63(14) |



|                    |            |                    |            |
|--------------------|------------|--------------------|------------|
| C(4)-C(3)-C(12)    | 123.12(15) | C(16)-C(15)-H(151) | 119.4      |
| C(3)-C(4)-C(5)     | 119.17(16) | C(15)-C(16)-C(17)  | 120.62(17) |
| C(3)-C(4)-H(41)    | 119.5      | C(15)-C(16)-H(161) | 119.8      |
| C(5)-C(4)-H(41)    | 121.3      | C(17)-C(16)-H(161) | 119.6      |
| C(4)-C(5)-C(6)     | 120.85(15) | C(16)-C(17)-C(18)  | 119.78(17) |
| C(4)-C(5)-H(51)    | 119.7      | C(16)-C(17)-H(171) | 118.9      |
| C(6)-C(5)-H(51)    | 119.5      | C(18)-C(17)-H(171) | 121.3      |
| C(5)-C(6)-C(7)     | 121.18(16) | C(17)-C(18)-C(19)  | 121.30(17) |
| C(5)-C(6)-C(11)    | 119.60(15) | C(17)-C(18)-H(181) | 119.2      |
| C(7)-C(6)-C(11)    | 119.22(17) | C(19)-C(18)-H(181) | 119.5      |
| C(6)-C(7)-C(8)     | 121.21(18) | C(14)-C(19)-C(18)  | 119.21(16) |
| C(6)-C(7)-H(71)    | 118.5      | C(14)-C(19)-C(20)  | 119.29(15) |
| C(8)-C(7)-H(71)    | 120.3      | C(18)-C(19)-C(20)  | 121.49(16) |
| C(7)-C(8)-C(9)     | 119.93(17) | C(19)-C(20)-C(21)  | 120.34(15) |
| C(7)-C(8)-H(81)    | 121.3      | C(19)-C(20)-H(201) | 119.2      |
| C(9)-C(8)-H(81)    | 118.8      | C(21)-C(20)-H(201) | 120.5      |
| C(8)-C(9)-C(10)    | 120.31(18) | C(20)-C(21)-C(22)  | 120.30(16) |
| C(8)-C(9)-H(91)    | 118.5      | C(20)-C(21)-H(211) | 120.1      |
| C(10)-C(9)-H(91)   | 121.2      | C(22)-C(21)-H(211) | 119.6      |
| C(9)-C(10)-C(11)   | 121.38(17) | C(21)-C(22)-C(13)  | 121.75(15) |
| C(9)-C(10)-H(101)  | 120.5      | C(21)-C(22)-O(23)  | 116.53(14) |
| C(11)-C(10)-H(101) | 118.2      | C(13)-C(22)-O(23)  | 121.60(14) |
| C(6)-C(11)-C(10)   | 117.88(15) | C(22)-O(23)-P(1)   | 126.87(10) |
| C(6)-C(11)-C(12)   | 118.86(15) | P(1)-N(24)-C(25)   | 118.00(11) |
| C(10)-C(11)-C(12)  | 123.24(15) | P(1)-N(24)-C(26)   | 124.46(11) |
| C(11)-C(12)-C(3)   | 118.37(15) | C(25)-N(24)-C(26)  | 117.48(13) |
| C(11)-C(12)-C(13)  | 122.50(14) | N(24)-C(25)-C(43)  | 112.02(14) |
| C(3)-C(12)-C(13)   | 119.04(14) | N(24)-C(25)-H(251) | 106.2      |
| C(12)-C(13)-C(14)  | 122.32(14) | C(43)-C(25)-H(251) | 105.8      |
| C(12)-C(13)-C(22)  | 119.90(14) | N(24)-C(25)-C(29)  | 113.44(16) |
| C(14)-C(13)-C(22)  | 117.78(14) | C(43)-C(25)-C(29)  | 115.50(15) |
| C(13)-C(14)-C(15)  | 121.83(14) | H(251)-C(25)-C(29) | 102.7      |
| C(13)-C(14)-C(19)  | 119.68(15) | N(24)-C(25)-C(43)  | 112.02(14) |
| C(15)-C(14)-C(19)  | 118.41(15) | N(24)-C(25)-H(251) | 106.2      |
| C(14)-C(15)-C(16)  | 120.64(16) | C(43)-C(25)-H(251) | 105.8      |
| C(14)-C(15)-H(151) | 119.9      | N(24)-C(25)-C(229) | 117.7(14)  |

|                     |            |                     |            |
|---------------------|------------|---------------------|------------|
| C(43)-C(25)-C(229)  | 100.2(12)  | C(43)-C(44)-H(441)  | 120.2      |
| H(251)-C(25)-C(229) | 114.4      | C(45)-C(44)-H(441)  | 119.2      |
| N(24)-C(26)-C(27)   | 112.52(15) | C(44)-C(45)-C(46)   | 118.95(17) |
| N(24)-C(26)-C(28)   | 113.13(15) | C(44)-C(45)-C(49)   | 120.6(2)   |
| C(27)-C(26)-C(28)   | 109.58(15) | C(46)-C(45)-C(49)   | 120.5(2)   |
| N(24)-C(26)-H(261)  | 105.0      | C(45)-C(46)-C(47)   | 122.30(19) |
| C(27)-C(26)-H(261)  | 107.2      | C(45)-C(46)-H(461)  | 119.4      |
| C(28)-C(26)-H(261)  | 109.1      | C(47)-C(46)-H(461)  | 118.3      |
| C(26)-C(27)-H(271)  | 109.8      | C(46)-C(47)-C(48)   | 117.58(19) |
| C(26)-C(27)-H(272)  | 112.1      | C(46)-C(47)-C(50)   | 121.26(19) |
| H(271)-C(27)-H(272) | 109.6      | C(48)-C(47)-C(50)   | 121.14(18) |
| C(26)-C(27)-H(273)  | 110.4      | C(47)-C(48)-C(43)   | 121.41(17) |
| H(271)-C(27)-H(273) | 106.9      | C(47)-C(48)-H(481)  | 119.6      |
| H(272)-C(27)-H(273) | 107.9      | C(43)-C(48)-H(481)  | 118.9      |
| C(26)-C(28)-H(283)  | 110.6      | C(45)-C(49)-H(493)  | 108.7      |
| C(26)-C(28)-H(282)  | 111.7      | C(45)-C(49)-H(492)  | 109.8      |
| H(283)-C(28)-H(282) | 108.7      | H(493)-C(49)-H(492) | 111.4      |
| C(26)-C(28)-H(281)  | 111.6      | C(45)-C(49)-H(491)  | 108.9      |
| H(283)-C(28)-H(281) | 108.1      | H(493)-C(49)-H(491) | 109.3      |
| H(282)-C(28)-H(281) | 105.9      | H(492)-C(49)-H(491) | 108.8      |
| C(32)-C(31)-H(311)  | 119.2      | C(47)-C(50)-H(501)  | 111.7      |
| C(32)-C(31)-C(30)   | 120.1(2)   | C(47)-C(50)-H(502)  | 110.4      |
| H(311)-C(31)-C(30)  | 120.6      | H(501)-C(50)-H(502) | 107.8      |
| C(31)-C(32)-C(33)   | 120.5(2)   | C(47)-C(50)-H(503)  | 109.2      |
| C(31)-C(32)-H(321)  | 120.0      | H(501)-C(50)-H(503) | 110.3      |
| C(33)-C(32)-H(321)  | 119.5      | H(502)-C(50)-H(503) | 107.5      |
| C(32)-C(33)-C(34)   | 121.1(2)   | O(52)-P(51)-O(73)   | 97.18(6)   |
| C(32)-C(33)-C(38)   | 119.4(2)   | O(52)-P(51)-N(74)   | 99.55(6)   |
| C(34)-C(33)-C(38)   | 119.5(2)   | O(73)-P(51)-N(74)   | 106.59(7)  |
| C(33)-C(34)-H(341)  | 119.0      | P(51)-O(52)-C(53)   | 112.29(10) |
| C(33)-C(34)-C(35)   | 121.3(2)   | O(52)-C(53)-C(54)   | 118.13(15) |
| H(341)-C(34)-C(35)  | 119.7      | O(52)-C(53)-C(62)   | 119.23(14) |
| C(25)-C(43)-C(44)   | 122.06(17) | C(54)-C(53)-C(62)   | 122.63(16) |
| C(25)-C(43)-C(48)   | 118.81(15) | C(53)-C(54)-C(55)   | 119.48(17) |
| C(44)-C(43)-C(48)   | 119.11(18) | C(53)-C(54)-H(541)  | 118.5      |
| C(43)-C(44)-C(45)   | 120.61(19) | C(55)-C(54)-H(541)  | 121.9      |

|                    |            |                    |            |
|--------------------|------------|--------------------|------------|
| C(54)-C(55)-C(56)  | 120.69(17) | C(66)-C(67)-C(68)  | 120.24(19) |
| C(54)-C(55)-H(551) | 120.6      | C(66)-C(67)-H(671) | 121.6      |
| C(56)-C(55)-H(551) | 118.7      | C(68)-C(67)-H(671) | 118.2      |
| C(55)-C(56)-C(57)  | 121.13(18) | C(67)-C(68)-C(69)  | 120.95(18) |
| C(55)-C(56)-C(61)  | 119.64(17) | C(67)-C(68)-H(681) | 121.8      |
| C(57)-C(56)-C(61)  | 119.23(19) | C(69)-C(68)-H(681) | 117.2      |
| C(56)-C(57)-C(58)  | 121.1(2)   | C(68)-C(69)-C(64)  | 118.95(18) |
| C(56)-C(57)-H(571) | 119.0      | C(68)-C(69)-C(70)  | 121.74(17) |
| C(58)-C(57)-H(571) | 119.9      | C(64)-C(69)-C(70)  | 119.30(16) |
| C(57)-C(58)-C(59)  | 119.8(2)   | C(69)-C(70)-C(71)  | 120.40(15) |
| C(57)-C(58)-H(581) | 119.6      | C(69)-C(70)-H(701) | 120.2      |
| C(59)-C(58)-H(581) | 120.5      | C(71)-C(70)-H(701) | 119.4      |
| C(58)-C(59)-C(60)  | 120.5(2)   | C(70)-C(71)-C(72)  | 120.31(17) |
| C(58)-C(59)-H(591) | 119.4      | C(70)-C(71)-H(711) | 121.4      |
| C(60)-C(59)-H(591) | 120.1      | C(72)-C(71)-H(711) | 118.3      |
| C(59)-C(60)-C(61)  | 121.32(18) | C(71)-C(72)-C(63)  | 121.75(16) |
| C(59)-C(60)-H(601) | 119.8      | C(71)-C(72)-O(73)  | 116.22(15) |
| C(61)-C(60)-H(601) | 118.9      | C(63)-C(72)-O(73)  | 121.82(14) |
| C(56)-C(61)-C(60)  | 117.73(16) | C(72)-O(73)-P(51)  | 126.67(10) |
| C(56)-C(61)-C(62)  | 119.02(16) | P(51)-N(74)-C(75)  | 117.45(11) |
| C(60)-C(61)-C(62)  | 123.24(16) | P(51)-N(74)-C(76)  | 125.56(11) |
| C(61)-C(62)-C(53)  | 118.40(14) | C(75)-N(74)-C(76)  | 116.74(13) |
| C(61)-C(62)-C(63)  | 122.78(15) | N(74)-C(75)-C(79)  | 114.07(13) |
| C(53)-C(62)-C(63)  | 118.74(14) | N(74)-C(75)-C(93)  | 111.65(13) |
| C(62)-C(63)-C(64)  | 122.26(14) | C(79)-C(75)-C(93)  | 114.21(13) |
| C(62)-C(63)-C(72)  | 119.80(15) | N(74)-C(75)-H(751) | 103.5      |
| C(64)-C(63)-C(72)  | 117.92(14) | C(79)-C(75)-H(751) | 107.0      |
| C(63)-C(64)-C(65)  | 122.17(15) | C(93)-C(75)-H(751) | 105.3      |
| C(63)-C(64)-C(69)  | 119.47(16) | N(74)-C(76)-C(77)  | 112.47(14) |
| C(65)-C(64)-C(69)  | 118.32(16) | N(74)-C(76)-C(78)  | 112.09(14) |
| C(64)-C(65)-C(66)  | 120.77(18) | C(77)-C(76)-C(78)  | 110.39(15) |
| C(64)-C(65)-H(651) | 118.7      | N(74)-C(76)-H(761) | 106.1      |
| C(66)-C(65)-H(651) | 120.5      | C(77)-C(76)-H(761) | 107.5      |
| C(65)-C(66)-C(67)  | 120.7(2)   | C(78)-C(76)-H(761) | 108.0      |
| C(65)-C(66)-H(661) | 118.9      | C(76)-C(77)-H(773) | 109.2      |
| C(67)-C(66)-H(661) | 120.3      | C(76)-C(77)-H(772) | 111.5      |

|                     |            |                        |            |
|---------------------|------------|------------------------|------------|
| H(773)-C(77)-H(772) | 107.3      | C(88)-C(87)-H(871)     | 120.4      |
| C(76)-C(77)-H(771)  | 111.9      | C(79)-C(88)-C(83)      | 119.07(16) |
| H(773)-C(77)-H(771) | 108.5      | C(79)-C(88)-C(87)      | 122.79(15) |
| H(772)-C(77)-H(771) | 108.2      | C(83)-C(88)-C(87)      | 118.14(16) |
| C(76)-C(78)-H(781)  | 110.3      | C(75)-C(93)-C(94)      | 117.69(14) |
| C(76)-C(78)-H(782)  | 110.0      | C(75)-C(93)-C(98)      | 122.76(14) |
| H(781)-C(78)-H(782) | 107.9      | C(94)-C(93)-C(98)      | 119.53(15) |
| C(76)-C(78)-H(783)  | 113.2      | C(93)-C(94)-C(95)      | 121.09(17) |
| H(781)-C(78)-H(783) | 108.0      | C(93)-C(94)-H(941)     | 119.4      |
| H(782)-C(78)-H(783) | 107.2      | C(95)-C(94)-H(941)     | 119.5      |
| C(75)-C(79)-C(80)   | 122.63(15) | C(94)-C(95)-C(96)      | 118.62(17) |
| C(75)-C(79)-C(88)   | 118.05(14) | C(94)-C(95)-C(99)      | 120.35(19) |
| C(80)-C(79)-C(88)   | 119.24(15) | C(96)-C(95)-C(99)      | 121.03(18) |
| C(79)-C(80)-C(81)   | 121.33(17) | C(95)-C(96)-C(97)      | 121.51(16) |
| C(79)-C(80)-H(801)  | 118.6      | C(95)-C(96)-H(961)     | 120.9      |
| C(81)-C(80)-H(801)  | 120.0      | C(97)-C(96)-H(961)     | 117.6      |
| C(80)-C(81)-C(82)   | 120.28(18) | C(96)-C(97)-C(98)      | 118.87(16) |
| C(80)-C(81)-H(811)  | 119.9      | C(96)-C(97)-C(100)     | 120.29(17) |
| C(82)-C(81)-H(811)  | 119.9      | C(98)-C(97)-C(100)     | 120.85(17) |
| C(81)-C(82)-C(83)   | 120.60(17) | C(97)-C(98)-C(93)      | 120.34(16) |
| C(81)-C(82)-H(821)  | 120.1      | C(97)-C(98)-H(981)     | 121.4      |
| C(83)-C(82)-H(821)  | 119.3      | C(93)-C(98)-H(981)     | 118.2      |
| C(82)-C(83)-C(84)   | 121.38(17) | C(95)-C(99)-H(993)     | 110.8      |
| C(82)-C(83)-C(88)   | 119.38(17) | C(95)-C(99)-H(992)     | 106.0      |
| C(84)-C(83)-C(88)   | 119.24(18) | H(993)-C(99)-H(992)    | 107.7      |
| C(83)-C(84)-C(85)   | 121.03(18) | C(95)-C(99)-H(991)     | 111.4      |
| C(83)-C(84)-H(841)  | 117.3      | H(993)-C(99)-H(991)    | 109.7      |
| C(85)-C(84)-H(841)  | 121.7      | H(992)-C(99)-H(991)    | 111.2      |
| C(84)-C(85)-C(86)   | 120.18(18) | C(97)-C(100)-H(1003)   | 115.2      |
| C(84)-C(85)-H(851)  | 119.7      | C(97)-C(100)-H(1002)   | 111.3      |
| C(86)-C(85)-H(851)  | 120.1      | H(1003)-C(100)-H(1002) | 108.2      |
| C(85)-C(86)-C(87)   | 120.32(19) | C(97)-C(100)-H(1001)   | 109.8      |
| C(85)-C(86)-H(861)  | 119.5      | H(1003)-C(100)-H(1001) | 104.9      |
| C(87)-C(86)-H(861)  | 120.1      | H(1002)-C(100)-H(1001) | 106.8      |
| C(86)-C(87)-C(88)   | 121.05(18) | C(235)-C(234)-H(2341)  | 118.0      |
| C(86)-C(87)-H(871)  | 118.5      | C(235)-C(234)-C(233)   | 124(2)     |

|                       |          |                        |          |
|-----------------------|----------|------------------------|----------|
| H(2341)-C(234)-C(233) | 118.1    | C(33)-C(38)-C(29)      | 118.9(2) |
| C(31)-C(30)-H(301)    | 119.8    | C(33)-C(38)-C(37)      | 117.3(2) |
| C(31)-C(30)-C(29)     | 121.3(2) | C(29)-C(38)-C(37)      | 123.8(2) |
| H(301)-C(30)-C(29)    | 118.9    | C(25)-C(229)-C(230)    | 126(3)   |
| H(351)-C(35)-C(34)    | 120.3    | C(25)-C(229)-C(238)    | 116(3)   |
| H(351)-C(35)-C(36)    | 119.8    | C(230)-C(229)-C(238)   | 118(3)   |
| C(34)-C(35)-C(36)     | 119.9(3) | H(2301)-C(230)-C(229)  | 118.5    |
| C(234)-C(235)-C(236)  | 113(3)   | H(2301)-C(230)-C(231)  | 118.4    |
| C(234)-C(235)-H(2351) | 123.4    | C(229)-C(230)-C(231)   | 123(3)   |
| C(236)-C(235)-H(2351) | 123.4    | C(230)-C(231)-H(2311)  | 120.3    |
| C(25)-C(29)-C(30)     | 121.3(2) | C(230)-C(231)-C(232)   | 119(2)   |
| C(25)-C(29)-C(38)     | 119.1(2) | H(2311)-C(231)-C(232)  | 120.6    |
| C(30)-C(29)-C(38)     | 119.5(2) | H(2321)-C(232)-C(231)  | 119.7    |
| C(235)-C(236)-C(237)  | 134(5)   | H(2321)-C(232)-C(233)  | 119.6    |
| C(235)-C(236)-H(2361) | 112.7    | C(231)-C(232)-C(233)   | 121(2)   |
| C(237)-C(236)-H(2361) | 113.3    | C(232)-C(233)-C(234)   | 124(2)   |
| C(35)-C(36)-H(361)    | 119.6    | C(232)-C(233)-C(238)   | 115(2)   |
| C(35)-C(36)-C(37)     | 119.8(4) | C(234)-C(233)-C(238)   | 120(2)   |
| H(361)-C(36)-C(37)    | 120.6    | C(237)-C(238)-C(229)   | 118(3)   |
| H(371)-C(37)-C(36)    | 118.8    | C(237)-C(238)-C(233)   | 119(3)   |
| H(371)-C(37)-C(38)    | 119.0    | C(229)-C(238)-C(233)   | 123(3)   |
| C(36)-C(37)-C(38)     | 122.2(3) | H(1012)-O(101)-H(1011) | 99.2     |
| C(236)-C(237)-H(2371) | 125.7    | H(1031)-O(103)-H(1032) | 109.5    |
| C(236)-C(237)-C(238)  | 109(4)   | H(1041)-O(104)-H(1042) | 109.5    |
| H(2371)-C(237)-C(238) | 125.8    |                        |          |

---

Symmetry transformations used to generate equivalent atoms:

Table 4. Anisotropic displacement parameters ( $\text{\AA}^2 \times 10^3$ ) for 6797. The anisotropic displacement factor exponent takes the form:  $-2\pi^2 [ h^2 a^{*2} U^{11} + \dots + 2 h k a^* b^* U^{12} ]$

|       | $U^{11}$ | $U^{22}$ | $U^{33}$ | $U^{23}$ | $U^{13}$ | $U^{12}$ |
|-------|----------|----------|----------|----------|----------|----------|
| P(1)  | 17(1)    | 29(1)    | 18(1)    | 2(1)     | 1(1)     | 0(1)     |
| O(2)  | 18(1)    | 27(1)    | 19(1)    | -1(1)    | 0(1)     | 2(1)     |
| C(3)  | 20(1)    | 25(1)    | 19(1)    | -1(1)    | 1(1)     | 0(1)     |
| C(4)  | 23(1)    | 25(1)    | 31(1)    | -2(1)    | 0(1)     | -4(1)    |
| C(5)  | 32(1)    | 21(1)    | 35(1)    | -4(1)    | 2(1)     | 0(1)     |
| C(6)  | 28(1)    | 26(1)    | 25(1)    | -3(1)    | 1(1)     | 4(1)     |
| C(7)  | 37(1)    | 30(1)    | 39(1)    | -4(1)    | -4(1)    | 10(1)    |
| C(8)  | 31(1)    | 39(1)    | 50(1)    | -6(1)    | -8(1)    | 15(1)    |
| C(9)  | 25(1)    | 45(1)    | 44(1)    | -4(1)    | -9(1)    | 5(1)     |
| C(10) | 24(1)    | 32(1)    | 31(1)    | -1(1)    | -4(1)    | 2(1)     |
| C(11) | 22(1)    | 26(1)    | 21(1)    | -1(1)    | 0(1)     | 3(1)     |
| C(12) | 21(1)    | 23(1)    | 19(1)    | -1(1)    | 2(1)     | -1(1)    |
| C(13) | 17(1)    | 23(1)    | 21(1)    | -1(1)    | -2(1)    | 1(1)     |
| C(14) | 17(1)    | 24(1)    | 24(1)    | 1(1)     | -3(1)    | -1(1)    |
| C(15) | 21(1)    | 32(1)    | 25(1)    | -1(1)    | 0(1)     | -4(1)    |
| C(16) | 26(1)    | 44(1)    | 27(1)    | 1(1)     | 4(1)     | -4(1)    |
| C(17) | 28(1)    | 41(1)    | 32(1)    | 12(1)    | -2(1)    | -11(1)   |
| C(18) | 27(1)    | 26(1)    | 37(1)    | 7(1)     | -6(1)    | -4(1)    |
| C(19) | 19(1)    | 24(1)    | 30(1)    | 3(1)     | -5(1)    | -1(1)    |
| C(20) | 25(1)    | 23(1)    | 36(1)    | -3(1)    | -6(1)    | 2(1)     |
| C(21) | 24(1)    | 29(1)    | 30(1)    | -8(1)    | -3(1)    | 4(1)     |
| C(22) | 18(1)    | 27(1)    | 21(1)    | -1(1)    | 0(1)     | 0(1)     |
| O(23) | 19(1)    | 35(1)    | 19(1)    | -4(1)    | 1(1)     | -1(1)    |
| N(24) | 18(1)    | 32(1)    | 23(1)    | 2(1)     | 3(1)     | 4(1)     |
| C(25) | 16(1)    | 42(1)    | 19(1)    | 2(1)     | 1(1)     | 3(1)     |
| C(26) | 22(1)    | 30(1)    | 31(1)    | 4(1)     | 2(1)     | 3(1)     |
| C(27) | 38(1)    | 36(1)    | 27(1)    | 6(1)     | 4(1)     | 5(1)     |
| C(28) | 41(1)    | 34(1)    | 49(1)    | -5(1)    | -1(1)    | 0(1)     |
| C(31) | 31(1)    | 102(2)   | 31(1)    | -25(1)   | -9(1)    | 10(1)    |
| C(32) | 33(1)    | 93(2)    | 32(1)    | -29(1)   | 0(1)     | 10(1)    |
| C(33) | 23(1)    | 61(2)    | 28(1)    | -9(1)    | 3(1)     | 4(1)     |
| C(34) | 30(1)    | 66(2)    | 38(1)    | -16(1)   | 4(1)     | 14(1)    |

|       |       |       |       |        |        |        |
|-------|-------|-------|-------|--------|--------|--------|
| C(43) | 14(1) | 44(1) | 26(1) | 7(1)   | -1(1)  | 1(1)   |
| C(44) | 21(1) | 53(1) | 29(1) | 10(1)  | 5(1)   | 4(1)   |
| C(45) | 20(1) | 56(1) | 40(1) | 21(1)  | 4(1)   | 2(1)   |
| C(46) | 26(1) | 41(1) | 49(1) | 16(1)  | -6(1)  | -4(1)  |
| C(47) | 35(1) | 40(1) | 34(1) | 6(1)   | -8(1)  | -5(1)  |
| C(48) | 30(1) | 42(1) | 23(1) | 8(1)   | -3(1)  | -4(1)  |
| C(49) | 47(1) | 62(1) | 55(1) | 25(1)  | 19(1)  | -1(1)  |
| C(50) | 77(2) | 39(1) | 41(1) | 0(1)   | -6(1)  | -8(1)  |
| P(51) | 20(1) | 20(1) | 28(1) | -4(1)  | -2(1)  | 1(1)   |
| O(52) | 18(1) | 25(1) | 24(1) | 1(1)   | 0(1)   | 0(1)   |
| C(53) | 23(1) | 33(1) | 22(1) | -1(1)  | 0(1)   | 1(1)   |
| C(54) | 28(1) | 63(1) | 24(1) | -5(1)  | 6(1)   | -4(1)  |
| C(55) | 40(1) | 86(2) | 21(1) | -11(1) | 4(1)   | -7(1)  |
| C(56) | 33(1) | 65(1) | 26(1) | -8(1)  | -2(1)  | -6(1)  |
| C(57) | 45(1) | 90(2) | 31(1) | -12(1) | -7(1)  | -13(1) |
| C(58) | 39(1) | 91(2) | 41(1) | -11(1) | -14(1) | -16(1) |
| C(59) | 29(1) | 66(1) | 43(1) | -11(1) | -1(1)  | -13(1) |
| C(60) | 28(1) | 47(1) | 30(1) | -7(1)  | 2(1)   | -7(1)  |
| C(61) | 25(1) | 39(1) | 26(1) | -5(1)  | -1(1)  | -5(1)  |
| C(62) | 24(1) | 26(1) | 20(1) | -2(1)  | 0(1)   | -2(1)  |
| C(63) | 20(1) | 24(1) | 21(1) | -1(1)  | 1(1)   | -5(1)  |
| C(64) | 20(1) | 28(1) | 25(1) | -4(1)  | 3(1)   | -6(1)  |
| C(65) | 22(1) | 32(1) | 35(1) | -3(1)  | 3(1)   | -1(1)  |
| C(66) | 25(1) | 35(1) | 57(1) | -6(1)  | 2(1)   | 1(1)   |
| C(67) | 29(1) | 44(1) | 60(1) | -24(1) | 11(1)  | -3(1)  |
| C(68) | 31(1) | 53(1) | 37(1) | -21(1) | 13(1)  | -13(1) |
| C(69) | 24(1) | 40(1) | 25(1) | -10(1) | 6(1)   | -12(1) |
| C(70) | 35(1) | 48(1) | 19(1) | -3(1)  | 3(1)   | -18(1) |
| C(71) | 29(1) | 38(1) | 24(1) | 8(1)   | -3(1)  | -10(1) |
| C(72) | 23(1) | 24(1) | 25(1) | 1(1)   | 2(1)   | -6(1)  |
| O(73) | 24(1) | 22(1) | 36(1) | 5(1)   | 0(1)   | -1(1)  |
| N(74) | 19(1) | 25(1) | 27(1) | -4(1)  | -3(1)  | 3(1)   |
| C(75) | 18(1) | 24(1) | 25(1) | -1(1)  | -1(1)  | 0(1)   |
| C(76) | 24(1) | 29(1) | 29(1) | -8(1)  | 0(1)   | 4(1)   |
| C(77) | 36(1) | 26(1) | 40(1) | -7(1)  | -3(1)  | 3(1)   |
| C(78) | 41(1) | 44(1) | 29(1) | -6(1)  | 4(1)   | 1(1)   |
| C(79) | 22(1) | 25(1) | 23(1) | -1(1)  | -1(1)  | 3(1)   |
| C(80) | 24(1) | 30(1) | 34(1) | 3(1)   | -2(1)  | -1(1)  |

|        |         |         |         |         |         |         |
|--------|---------|---------|---------|---------|---------|---------|
| C(81)  | 40(1)   | 28(1)   | 38(1)   | 8(1)    | 2(1)    | -1(1)   |
| C(82)  | 45(1)   | 31(1)   | 30(1)   | 4(1)    | -4(1)   | 9(1)    |
| C(83)  | 31(1)   | 32(1)   | 24(1)   | -5(1)   | -2(1)   | 8(1)    |
| C(84)  | 37(1)   | 44(1)   | 31(1)   | -8(1)   | -10(1)  | 14(1)   |
| C(85)  | 23(1)   | 54(1)   | 42(1)   | -17(1)  | -10(1)  | 7(1)    |
| C(86)  | 22(1)   | 46(1)   | 39(1)   | -13(1)  | -1(1)   | -3(1)   |
| C(87)  | 23(1)   | 36(1)   | 29(1)   | -5(1)   | 0(1)    | -1(1)   |
| C(88)  | 21(1)   | 29(1)   | 22(1)   | -5(1)   | 1(1)    | 3(1)    |
| C(93)  | 20(1)   | 26(1)   | 24(1)   | -3(1)   | -2(1)   | -2(1)   |
| C(94)  | 45(1)   | 26(1)   | 26(1)   | -3(1)   | -2(1)   | 0(1)    |
| C(95)  | 55(1)   | 30(1)   | 26(1)   | -2(1)   | -2(1)   | -5(1)   |
| C(96)  | 36(1)   | 41(1)   | 24(1)   | -8(1)   | -1(1)   | -5(1)   |
| C(97)  | 18(1)   | 35(1)   | 30(1)   | -8(1)   | -2(1)   | 1(1)    |
| C(98)  | 20(1)   | 26(1)   | 28(1)   | -1(1)   | -2(1)   | 2(1)    |
| C(99)  | 122(3)  | 39(1)   | 26(1)   | 2(1)    | 2(1)    | 5(1)    |
| C(100) | 38(1)   | 47(1)   | 38(1)   | -13(1)  | -3(1)   | 15(1)   |
| C(234) | 30(1)   | 66(2)   | 38(1)   | -16(1)  | 4(1)    | 14(1)   |
| C(30)  | 22(1)   | 72(2)   | 28(1)   | -8(1)   | -1(1)   | 9(1)    |
| C(35)  | 23(1)   | 68(2)   | 39(1)   | -2(1)   | 3(1)    | 16(1)   |
| C(235) | 23(1)   | 68(2)   | 39(1)   | -2(1)   | 3(1)    | 16(1)   |
| C(29)  | 20(1)   | 41(2)   | 21(1)   | 2(1)    | 2(1)    | 6(1)    |
| C(236) | 18(2)   | 45(2)   | 33(1)   | 3(1)    | -4(1)   | 4(1)    |
| C(36)  | 18(2)   | 45(2)   | 33(1)   | 3(1)    | -4(1)   | 4(1)    |
| C(37)  | 21(1)   | 30(2)   | 23(1)   | 0(1)    | 1(1)    | 3(1)    |
| C(237) | 21(1)   | 30(2)   | 23(1)   | 0(1)    | 1(1)    | 3(1)    |
| C(38)  | 20(1)   | 41(1)   | 20(1)   | 3(1)    | 3(1)    | 2(1)    |
| C(229) | 20(1)   | 41(2)   | 21(1)   | 2(1)    | 2(1)    | 6(1)    |
| C(230) | 22(1)   | 72(2)   | 28(1)   | -8(1)   | -1(1)   | 9(1)    |
| C(231) | 31(1)   | 102(2)  | 31(1)   | -25(1)  | -9(1)   | 10(1)   |
| C(232) | 33(1)   | 93(2)   | 32(1)   | -29(1)  | 0(1)    | 10(1)   |
| C(233) | 23(1)   | 61(2)   | 28(1)   | -9(1)   | 3(1)    | 4(1)    |
| C(238) | 20(1)   | 41(1)   | 20(1)   | 3(1)    | 3(1)    | 2(1)    |
| O(101) | 58(9)   | 144(16) | 29(5)   | -14(8)  | 0(5)    | -52(10) |
| O(103) | 200(30) | 74(12)  | 73(12)  | 15(9)   | -94(15) | -51(15) |
| O(104) | 62(16)  | 100(20) | 250(50) | 120(30) | -40(20) | -46(16) |

---



Table 5. Hydrogen coordinates ( $\times 10^4$ ) and isotropic displacement parameters ( $\text{\AA}^2 \times 10^{-3}$ ) for 6797.

|        | x     | y    | z    | U(eq) |
|--------|-------|------|------|-------|
| H(41)  | 9432  | 6603 | 3906 | 32    |
| H(51)  | 8115  | 7500 | 3778 | 36    |
| H(71)  | 6398  | 7701 | 3624 | 42    |
| H(81)  | 4905  | 7104 | 3472 | 49    |
| H(91)  | 4712  | 5628 | 3380 | 44    |
| H(101) | 6014  | 4688 | 3489 | 35    |
| H(151) | 6647  | 4579 | 4366 | 31    |
| H(161) | 5632  | 3753 | 4783 | 38    |
| H(171) | 5421  | 2292 | 4624 | 41    |
| H(181) | 6289  | 1651 | 4079 | 36    |
| H(201) | 7486  | 1743 | 3483 | 33    |
| H(211) | 8633  | 2530 | 3112 | 34    |
| H(251) | 12149 | 3796 | 3755 | 30    |
| H(261) | 9792  | 3287 | 3947 | 33    |
| H(271) | 10665 | 2866 | 4546 | 50    |
| H(272) | 11666 | 3102 | 4323 | 49    |
| H(273) | 10939 | 3832 | 4461 | 50    |
| H(283) | 10420 | 1856 | 3888 | 62    |
| H(282) | 11348 | 2220 | 3635 | 61    |
| H(281) | 10349 | 2269 | 3416 | 62    |
| H(301) | 10911 | 3453 | 2792 | 50    |
| H(311) | 11410 | 2489 | 2237 | 66    |
| H(321) | 12921 | 1910 | 2248 | 63    |
| H(341) | 14522 | 1842 | 2583 | 54    |
| H(351) | 15620 | 2268 | 3099 | 51    |
| H(361) | 15190 | 3310 | 3619 | 37    |
| H(371) | 13640 | 3845 | 3646 | 29    |
| H(441) | 12575 | 5014 | 2854 | 41    |
| H(461) | 12874 | 7275 | 3478 | 46    |
| H(481) | 11672 | 5268 | 4099 | 38    |

|        |       |       |      |    |
|--------|-------|-------|------|----|
| H(493) | 13402 | 7182  | 2760 | 81 |
| H(492) | 13767 | 6270  | 2607 | 82 |
| H(491) | 12761 | 6601  | 2475 | 82 |
| H(501) | 11380 | 6969  | 4318 | 79 |
| H(502) | 12397 | 6726  | 4497 | 78 |
| H(503) | 12303 | 7522  | 4187 | 78 |
| H(541) | 6997  | -162  | 2912 | 46 |
| H(551) | 5701  | -531  | 2464 | 60 |
| H(571) | 3974  | -773  | 2366 | 66 |
| H(581) | 2458  | -948  | 2652 | 68 |
| H(591) | 2231  | -854  | 3415 | 55 |
| H(601) | 3514  | -570  | 3867 | 43 |
| H(651) | 4112  | 1131  | 3780 | 36 |
| H(661) | 3025  | 2063  | 4098 | 46 |
| H(671) | 2784  | 2039  | 4867 | 54 |
| H(681) | 3684  | 1114  | 5290 | 47 |
| H(701) | 4918  | -24   | 5363 | 41 |
| H(711) | 6122  | -837  | 5053 | 36 |
| H(751) | 9619  | 135   | 4347 | 25 |
| H(761) | 7297  | 608   | 4565 | 33 |
| H(773) | 8210  | 1811  | 4652 | 51 |
| H(772) | 9181  | 1339  | 4602 | 51 |
| H(771) | 8512  | 1477  | 4196 | 50 |
| H(781) | 7937  | 708   | 5276 | 56 |
| H(782) | 8840  | 174   | 5136 | 55 |
| H(783) | 7852  | -276  | 5163 | 56 |
| H(801) | 8389  | -1710 | 4668 | 35 |
| H(811) | 8933  | -2703 | 5195 | 42 |
| H(821) | 10481 | -2639 | 5458 | 43 |
| H(841) | 12079 | -2018 | 5419 | 45 |
| H(851) | 13147 | -1003 | 5140 | 48 |
| H(861) | 12672 | -99   | 4566 | 44 |
| H(871) | 11122 | -110  | 4311 | 33 |
| H(941) | 9240  | 645   | 3592 | 39 |
| H(961) | 10392 | -846  | 2635 | 40 |
| H(981) | 10013 | -1811 | 3849 | 30 |

|         |       |       |      |     |
|---------|-------|-------|------|-----|
| H(993)  | 9492  | 574   | 2466 | 93  |
| H(992)  | 10349 | 1016  | 2715 | 94  |
| H(991)  | 9249  | 1206  | 2858 | 94  |
| H(1003) | 10773 | -2741 | 3279 | 62  |
| H(1002) | 11190 | -2244 | 2878 | 63  |
| H(1001) | 10169 | -2592 | 2872 | 64  |
| H(2321) | 13087 | 2657  | 2091 | 63  |
| H(2311) | 11600 | 3316  | 2090 | 66  |
| H(2341) | 14763 | 2629  | 2430 | 53  |
| H(2301) | 11003 | 3867  | 2738 | 49  |
| H(2351) | 15682 | 2683  | 3027 | 52  |
| H(2361) | 14979 | 3247  | 3647 | 38  |
| H(2371) | 13561 | 3911  | 3718 | 30  |
| H(1012) | 1556  | 1122  | 2319 | 94  |
| H(1011) | 2504  | 878   | 2442 | 94  |
| H(1041) | 8037  | 6351  | 1747 | 130 |
| H(1042) | 7641  | 5438  | 1855 | 130 |
| H(1031) | 7684  | 6575  | 1900 | 110 |
| H(1032) | 7279  | 5664  | 2004 | 110 |

---

Table 6. Hydrogen bonds for 6797 [ $\text{\AA}$  and  $^\circ$ ].

| D-H...A                   | d(D-H) | d(H...A) | d(D...A) | $\angle(\text{DHA})$ |
|---------------------------|--------|----------|----------|----------------------|
| C(44)-H(441)...C(230)     | 0.95   | 2.49     | 3.094(8) | 122                  |
| C(70)-H(701)...O(2)#1     | 0.93   | 2.43     | 3.347(8) | 172                  |
| C(99)-H(992)...O(101)#2   | 0.99   | 2.57     | 3.376(8) | 138                  |
| C(232)-H(2321)...C(7)#3   | 0.93   | 2.45     | 3.366(8) | 168                  |
| O(101)-H(1012)...C(31)#4  | 0.92   | 2.44     | 3.162(8) | 135                  |
| O(101)-H(1011)...C(32)#4  | 0.95   | 2.25     | 2.869(8) | 122                  |
| O(101)-H(1011)...O(103)#5 | 0.95   | 2.06     | 2.779(8) | 131                  |
| O(104)-H(1042)...C(58)#6  | 0.95   | 2.34     | 3.205(8) | 151                  |
| O(104)-H(1042)...C(59)#6  | 0.95   | 2.05     | 2.728(8) | 127                  |
| O(103)-H(1032)...C(58)#6  | 0.95   | 2.38     | 3.279(8) | 157                  |
| O(103)-H(1032)...C(59)#6  | 0.95   | 2.41     | 3.199(8) | 140                  |

Symmetry transformations used to generate equivalent atoms:

#1  $x-1/2, -y+1/2, -z+1$  #2  $x+1, y, z$  #3  $-x+2, y-1/2, -z+1/2$

#4  $x-1, y, z$  #5  $-x+1, y-1/2, -z+1/2$  #6  $-x+1, y+1/2, -z+1/2$

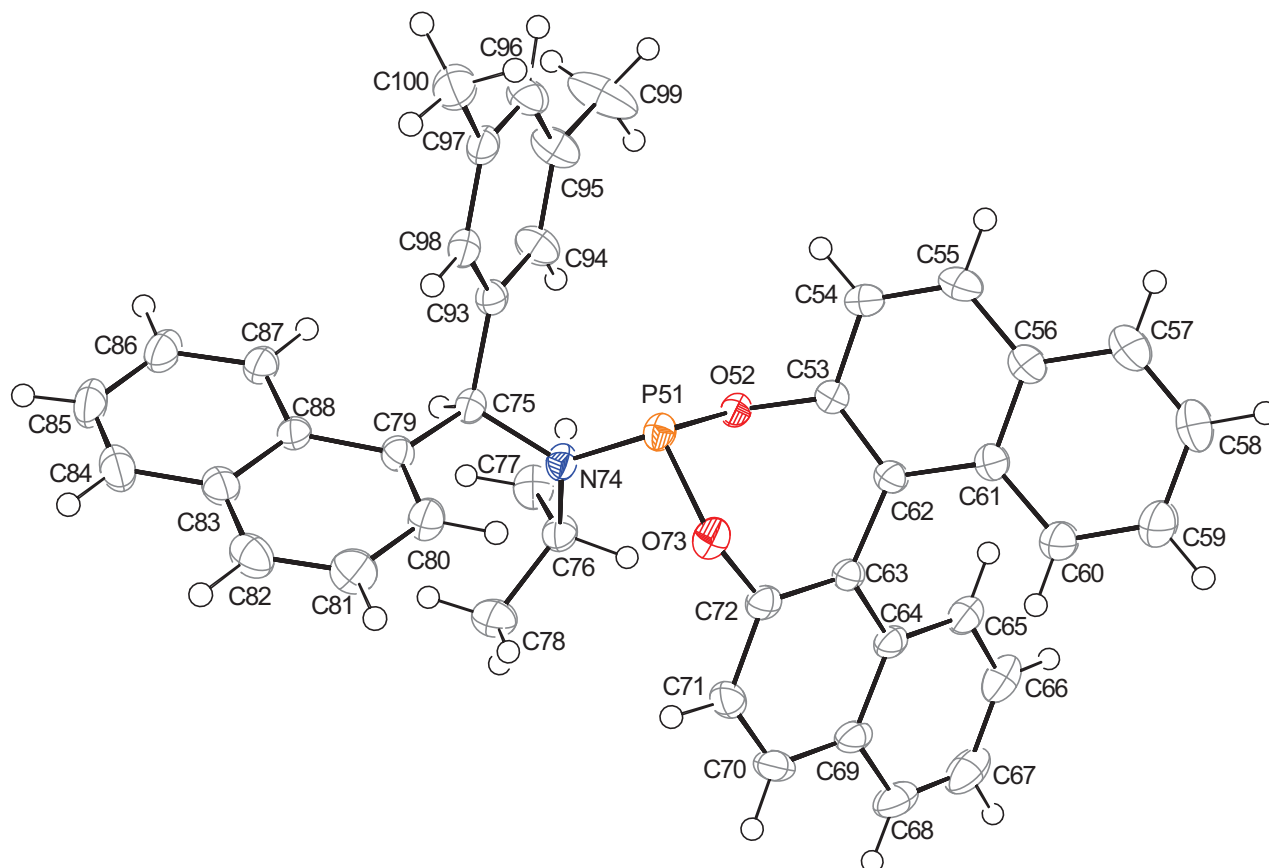

This structure is a  $Z'=2$  and therefore contain two unique molecules in the asymmetric unit. These two molecules are offset by 50 in the numbering scheme – only one molecule is drawn here for clarity.
