# Supplementary material for: Formation of quaternary centres by copper catalysed asymmetric conjugate addition to β-substituted cyclopentenones with the aid of a quantitative structure–selectivity relationship
Source: PubMed Central journal article supplement — Chem Sci. 2018 Feb 5;9(9):2628–32. doi: 10.1039/c7sc05304e (PMC5892328; doi:10.1039/c7sc05304e), 2018-02-05
Supplement: SC-009-C7SC05304E-s005.pdf [file SC-009-C7SC05304E-s005.pdf]

## Supporting Information

### **Formation of quaternary centres by copper catalysed asymmetric conjugate addition to $\beta$ -substituted cyclopentenones with the aid of a quantitative structure-selectivity relationship**

Ruchuta Ardkhean, Mike Mortimore, Robert S. Paton\* and Stephen P. Fletcher\*

## X-ray Crystallography

Low temperature, single crystal X-ray diffraction data for **L26** (*S*)-amine.HCl and **L28** (*S*)-amine.HCl salts were collected with a (Rigaku) Oxford Diffraction SuperNova A diffractometer at 150 K. Raw frame data were collected and reduced using CrysAlisPro. The structure was solved *ab initio* using SuperFlip<sup>[1]</sup> and refined using CRYSTALS.<sup>[2]</sup> Further details about the refinement are documented in the CIF. The crystallographic data have been deposited with the CCDC as entries 1818574 and 1818575.

**Table 1.** Summary of X-ray crystallographic data

| Compound Number                                     | <b>L26</b> -( <i>S</i> )-amine.HCl salt        | <b>L28</b> -( <i>S</i> )-amine.HCl salt            |
|-----------------------------------------------------|------------------------------------------------|----------------------------------------------------|
| Moiety Formula                                      | C <sub>24</sub> H <sub>30</sub> NCl            | C <sub>22</sub> H <sub>20</sub> F <sub>6</sub> NCl |
| CCDC                                                | 1818574                                        | 1818575                                            |
| Space Group                                         | P 2 <sub>1</sub> 2 <sub>1</sub> 2 <sub>1</sub> | P 2 <sub>1</sub>                                   |
| a [Å]                                               | 8.33200(10)                                    | 11.4023(2)                                         |
| b [Å]                                               | 11.3877(2)                                     | 8.44600(10)                                        |
| c [Å]                                               | 22.1875(4)                                     | 12.1680(2)                                         |
| α [°]                                               | 90                                             | 90                                                 |
| β [°]                                               | 90                                             | 117.387(2)                                         |
| γ [°]                                               | 90                                             | 90                                                 |
| V [Å <sup>3</sup> ]                                 | 2105.20(6)                                     | 1040.49(3)                                         |
| Z                                                   | 4                                              | 2                                                  |
| T [K]                                               | 150                                            | 150                                                |
| Total Reflections                                   | 16356                                          | 11013                                              |
| R <sub>int</sub>                                    | 0.0385                                         | 0.0213                                             |
| Reflections, Restraints, Parameters (I > 3.0/σ(I))  | 4368, 452, 309                                 | 4285, 565, 345                                     |
| Min. and Max. Residual Density, [eÅ <sup>-3</sup> ] | -0.18, 0.28                                    | -0.42, 0.41                                        |
| R <sub>1</sub> (I > 2σ(I))                          | 0.0317                                         | 0.0357                                             |
| wR <sub>2</sub>                                     | 0.0796                                         | 0.0937                                             |
| Absolute Struct. (Flack param.)                     | -0.007(12)                                     | -0.007(15)                                         |

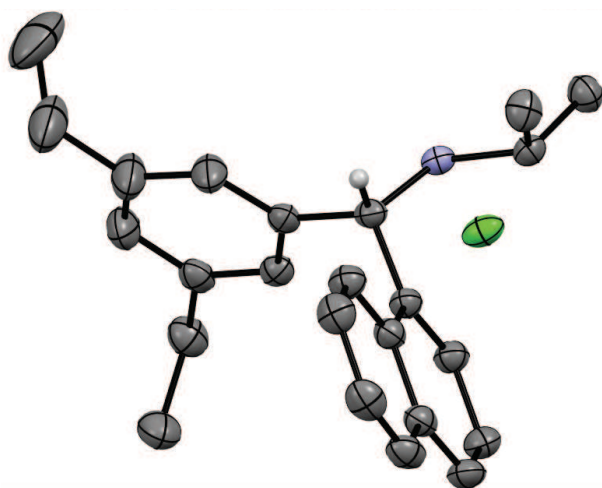

**Figure 1:** Solid state structure of **L26-(S)-amine.HCl** salt. Displacement ellipsoid plots are drawn at 50% probability. Hydrogen atoms (except at the stereocentre) and disordered components are omitted for clarity.

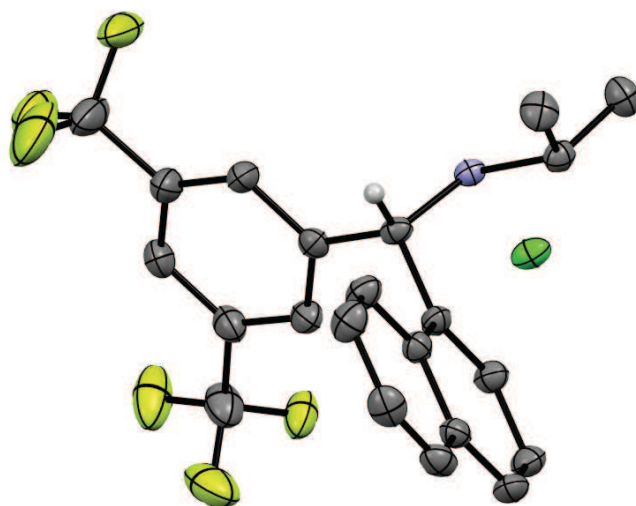

**Figure 2:** Solid state structure of **L28-(S)-amine.HCl** salt. Displacement ellipsoid plots are drawn at 50% probability. Hydrogen atoms (except at the stereocentre) and disordered components are omitted for clarity.

[1] L. Palatinus & G. Chapuis, *J. Appl. Cryst.*, **2007**, *40*, 786–790.

[2] a) P. W. Betteridge, J. R. Carruthers, R. I. Cooper, K. Prout, & D. J. Watkin, *J. Appl. Cryst.*, **2003**, *36*, 1487;  
b) R. I. Cooper, A. L. Thompson & D. J. Watkin, *J. Appl. Cryst.* **2010**, *43*, 1100–1107.
