# Supplementary material for: Formation of quaternary centres by copper catalysed asymmetric conjugate addition to β-substituted cyclopentenones with the aid of a quantitative structure–selectivity relationship
Source: PubMed Central journal article supplement — Chem Sci. 2018 Feb 5;9(9):2628–32. doi: 10.1039/c7sc05304e (PMC5892328; doi:10.1039/c7sc05304e), 2018-02-05
Supplement: SC-009-C7SC05304E-s006.pdf [file SC-009-C7SC05304E-s006.pdf]

## Supporting Information

### **Formation of quaternary centres by copper catalysed asymmetric conjugate addition to $\beta$ -substituted cyclopentenones with the aid of a quantitative structure-selectivity relationship**

Ruchuta Ardkhean, Mike Mortimore, Robert S. Paton\* and Stephen P. Fletcher\*

Table 1. Crystal data and structure refinement for 6791.

|                                   |                                                                                              |                   |
|-----------------------------------|----------------------------------------------------------------------------------------------|-------------------|
| Identification code               | 6791                                                                                         |                   |
| Empirical formula                 | C <sub>93</sub> H <sub>78</sub> Cl <sub>2</sub> N <sub>2</sub> O <sub>4</sub> P <sub>2</sub> |                   |
| Formula weight                    | 1420.51                                                                                      |                   |
| Temperature                       | 150 K                                                                                        |                   |
| Wavelength                        | 1.54180 Å                                                                                    |                   |
| Crystal system                    | Monoclinic                                                                                   |                   |
| Space group                       | P 21                                                                                         |                   |
| Unit cell dimensions              | a = 13.92750(10) Å                                                                           | α = 90°.          |
|                                   | b = 18.66730(10) Å                                                                           | β = 110.7566(8)°. |
|                                   | c = 15.27460(10) Å                                                                           | γ = 90°.          |
| Volume                            | 3713.47(5) Å <sup>3</sup>                                                                    |                   |
| Z                                 | 2                                                                                            |                   |
| Density (calculated)              | 1.270 Mg/m <sup>3</sup>                                                                      |                   |
| Absorption coefficient            | 1.627 mm <sup>-1</sup>                                                                       |                   |
| F(000)                            | 1492                                                                                         |                   |
| Crystal size                      | 0.22 x 0.08 x 0.02 mm <sup>3</sup>                                                           |                   |
| Theta range for data collection   | 3.094 to 76.281°.                                                                            |                   |
| Index ranges                      | -17 ≤ h ≤ 17, -23 ≤ k ≤ 23, -19 ≤ l ≤ 19                                                     |                   |
| Reflections collected             | 102352                                                                                       |                   |
| Independent reflections           | 15438 [R(int) = 0.066]                                                                       |                   |
| Completeness to theta = 76.281°   | 99.8 %                                                                                       |                   |
| Absorption correction             | Semi-empirical from equivalents                                                              |                   |
| Max. and min. transmission        | 0.97 and 0.68                                                                                |                   |
| Refinement method                 | Full-matrix least-squares on F <sup>2</sup>                                                  |                   |
| Data / restraints / parameters    | 15438 / 1 / 929                                                                              |                   |
| Goodness-of-fit on F <sup>2</sup> | 1.0071                                                                                       |                   |
| Final R indices [I > 2σ(I)]       | R1 = 0.0453, wR2 = 0.1169                                                                    |                   |
| R indices (all data)              | R1 = 0.0475, wR2 = 0.1194                                                                    |                   |
| Absolute structure parameter      | 0.001(11)                                                                                    |                   |
| Largest diff. peak and hole       | 0.42 and -0.41 e.Å <sup>-3</sup>                                                             |                   |

Table 2. Atomic coordinates ( $\times 10^4$ ) and equivalent isotropic displacement parameters ( $\text{\AA}^2 \times 10^3$ ) for 6791.  $U(\text{eq})$  is defined as one third of the trace of the orthogonalized  $U^{ij}$  tensor.

|       | x       | y       | z       | $U(\text{eq})$ |
|-------|---------|---------|---------|----------------|
| P(1)  | 4624(1) | 5001(1) | 6088(1) | 21             |
| O(2)  | 4093(1) | 4243(1) | 6272(1) | 24             |
| C(3)  | 3364(2) | 4188(1) | 6694(2) | 22             |
| C(4)  | 3631(2) | 3793(1) | 7535(2) | 26             |
| C(5)  | 2952(2) | 3742(1) | 7991(2) | 29             |
| C(6)  | 1998(2) | 4097(1) | 7649(2) | 26             |
| C(7)  | 1323(2) | 4100(2) | 8158(2) | 34             |
| C(8)  | 420(2)  | 4466(2) | 7841(2) | 37             |
| C(9)  | 132(2)  | 4841(2) | 6993(2) | 32             |
| C(10) | 755(2)  | 4839(1) | 6471(2) | 25             |
| C(11) | 1711(2) | 4466(1) | 6783(2) | 21             |
| C(12) | 2404(2) | 4488(1) | 6281(2) | 20             |
| C(13) | 2143(2) | 4864(1) | 5368(2) | 20             |
| C(14) | 1271(2) | 4674(1) | 4565(2) | 23             |
| C(15) | 658(2)  | 4064(1) | 4543(2) | 28             |
| C(16) | -168(2) | 3900(2) | 3763(2) | 35             |
| C(17) | -432(2) | 4333(2) | 2963(2) | 39             |
| C(18) | 148(2)  | 4915(2) | 2946(2) | 34             |
| C(19) | 1026(2) | 5098(1) | 3736(2) | 26             |
| C(20) | 1656(2) | 5687(2) | 3721(2) | 30             |
| C(21) | 2520(2) | 5836(1) | 4474(2) | 27             |
| C(22) | 2766(2) | 5413(1) | 5286(2) | 23             |
| O(23) | 3663(1) | 5560(1) | 6028(1) | 23             |
| N(24) | 5429(2) | 5265(1) | 7124(1) | 23             |
| C(25) | 6519(2) | 5388(1) | 7257(2) | 24             |
| C(26) | 5107(2) | 5360(2) | 7950(2) | 29             |
| C(27) | 5211(3) | 6128(2) | 8297(3) | 54             |
| C(28) | 5677(2) | 4849(2) | 8748(2) | 47             |
| C(29) | 6772(2) | 6171(1) | 7146(2) | 23             |
| C(30) | 6055(2) | 6627(1) | 6599(2) | 25             |
| C(31) | 6277(2) | 7359(1) | 6471(2) | 25             |

|       |         |          |         |    |
|-------|---------|----------|---------|----|
| C(32) | 5520(2) | 7800(2)  | 5843(2) | 30 |
| C(33) | 5732(2) | 8499(2)  | 5692(2) | 35 |
| C(34) | 6702(2) | 8779(2)  | 6177(2) | 38 |
| C(35) | 7455(2) | 8362(1)  | 6799(2) | 33 |
| C(36) | 7267(2) | 7637(1)  | 6947(2) | 26 |
| C(37) | 8062(2) | 7151(1)  | 7534(2) | 26 |
| C(38) | 9079(2) | 7380(2)  | 7982(2) | 33 |
| C(39) | 9837(2) | 6914(2)  | 8479(2) | 36 |
| C(40) | 9612(2) | 6193(2)  | 8531(2) | 35 |
| C(41) | 8617(2) | 5952(2)  | 8117(2) | 29 |
| C(42) | 7816(2) | 6424(1)  | 7608(2) | 24 |
| C(43) | 6883(2) | 4886(1)  | 6640(2) | 25 |
| C(44) | 7226(2) | 5137(1)  | 5952(2) | 27 |
| C(45) | 7574(2) | 4673(2)  | 5413(2) | 30 |
| C(46) | 7555(2) | 3941(2)  | 5578(2) | 33 |
| C(47) | 7198(2) | 3670(2)  | 6254(2) | 32 |
| C(48) | 6877(2) | 4150(1)  | 6792(2) | 30 |
| C(49) | 7972(2) | 4965(2)  | 4693(2) | 39 |
| C(50) | 7161(3) | 2872(2)  | 6413(3) | 48 |
| P(51) | 4478(1) | 11163(1) | 8475(1) | 20 |
| O(52) | 3445(1) | 10644(1) | 7973(1) | 22 |
| C(53) | 2624(2) | 10867(1) | 8221(2) | 22 |
| C(54) | 2462(2) | 10518(2) | 8971(2) | 28 |
| C(55) | 1695(2) | 10746(2) | 9265(2) | 30 |
| C(56) | 1070(2) | 11339(2) | 8829(2) | 28 |
| C(57) | 282(2)  | 11589(2) | 9139(2) | 36 |
| C(58) | -298(2) | 12170(2) | 8730(2) | 41 |
| C(59) | -108(2) | 12535(2) | 8001(2) | 39 |
| C(60) | 641(2)  | 12301(1) | 7676(2) | 29 |
| C(61) | 1232(2) | 11688(1) | 8061(2) | 23 |
| C(62) | 2017(2) | 11423(1) | 7737(2) | 20 |
| C(63) | 2235(2) | 11750(1) | 6942(2) | 20 |
| C(64) | 1462(2) | 11801(1) | 6023(2) | 21 |
| C(65) | 470(2)  | 11502(1) | 5800(2) | 25 |
| C(66) | -245(2) | 11546(2) | 4912(2) | 31 |
| C(67) | 5(2)    | 11884(2) | 4197(2) | 37 |
| C(68) | 949(2)  | 12174(2) | 4385(2) | 33 |

|         |         |          |          |    |
|---------|---------|----------|----------|----|
| C(69)   | 1711(2) | 12136(1) | 5295(2)  | 24 |
| C(70)   | 2707(2) | 12417(1) | 5488(2)  | 27 |
| C(71)   | 3446(2) | 12338(1) | 6349(2)  | 24 |
| C(72)   | 3212(2) | 11983(1) | 7065(2)  | 21 |
| O(73)   | 3999(1) | 11923(1) | 7927(1)  | 23 |
| N(74)   | 5214(2) | 10825(1) | 7930(1)  | 23 |
| C(75)   | 6298(2) | 10666(1) | 8474(2)  | 23 |
| C(76)   | 4839(2) | 10706(2) | 6901(2)  | 29 |
| C(77)   | 4846(3) | 9918(2)  | 6657(2)  | 50 |
| C(78)   | 5422(3) | 11160(2) | 6427(2)  | 51 |
| C(79)   | 6501(2) | 9890(1)  | 8800(2)  | 23 |
| C(80)   | 5772(2) | 9480(1)  | 8942(2)  | 24 |
| C(81)   | 5956(2) | 8761(1)  | 9288(2)  | 23 |
| C(82)   | 5193(2) | 8369(2)  | 9487(2)  | 30 |
| C(83)   | 5377(2) | 7681(2)  | 9827(2)  | 31 |
| C(84)   | 6332(2) | 7365(1)  | 9975(2)  | 30 |
| C(85)   | 7089(2) | 7733(1)  | 9783(2)  | 27 |
| C(86)   | 6927(2) | 8446(1)  | 9447(2)  | 23 |
| C(87)   | 7731(2) | 8875(1)  | 9308(2)  | 22 |
| C(88)   | 8729(2) | 8605(1)  | 9501(2)  | 29 |
| C(89)   | 9502(2) | 9021(2)  | 9428(2)  | 34 |
| C(90)   | 9306(2) | 9737(2)  | 9147(2)  | 33 |
| C(91)   | 8341(2) | 10018(2) | 8941(2)  | 29 |
| C(92)   | 7525(2) | 9600(1)  | 9006(2)  | 22 |
| C(93)   | 6734(2) | 11190(1) | 9288(2)  | 26 |
| C(94)   | 6997(2) | 10979(1) | 10215(2) | 29 |
| C(95)   | 7350(2) | 11469(2) | 10946(2) | 35 |
| C(96)   | 7430(2) | 12184(2) | 10724(2) | 40 |
| C(97)   | 7196(2) | 12412(2) | 9812(3)  | 41 |
| C(98)   | 6850(2) | 11911(2) | 9092(2)  | 33 |
| C(99)   | 7648(3) | 11221(2) | 11945(2) | 48 |
| C(100)  | 7309(3) | 13186(2) | 9588(4)  | 66 |
| Cl(101) | 2949(1) | 8595(1)  | 7369(1)  | 58 |
| C(102)  | 3752(3) | 7991(3)  | 7081(4)  | 70 |
| Cl(103) | 3069(1) | 7356(1)  | 6254(1)  | 63 |

---

Table 3. Bond lengths [ $\text{\AA}$ ] and angles [ $^\circ$ ] for 6791.

---

|              |            |              |          |
|--------------|------------|--------------|----------|
| P(1)-O(2)    | 1.6640(18) | C(19)-C(20)  | 1.412(4) |
| P(1)-O(23)   | 1.6739(17) | C(20)-C(21)  | 1.366(4) |
| P(1)-N(24)   | 1.658(2)   | C(20)-H(201) | 0.939    |
| O(2)-C(3)    | 1.387(3)   | C(21)-C(22)  | 1.406(3) |
| C(3)-C(4)    | 1.411(3)   | C(21)-H(211) | 0.944    |
| C(3)-C(12)   | 1.379(3)   | C(22)-O(23)  | 1.385(3) |
| C(4)-C(5)    | 1.363(4)   | N(24)-C(25)  | 1.476(3) |
| C(4)-H(41)   | 0.930      | N(24)-C(26)  | 1.492(3) |
| C(5)-C(6)    | 1.410(4)   | C(25)-C(29)  | 1.526(3) |
| C(5)-H(51)   | 0.916      | C(25)-C(43)  | 1.537(3) |
| C(6)-C(7)    | 1.416(4)   | C(25)-H(251) | 1.013    |
| C(6)-C(11)   | 1.419(3)   | C(26)-C(27)  | 1.517(4) |
| C(7)-C(8)    | 1.360(4)   | C(26)-C(28)  | 1.529(4) |
| C(7)-H(71)   | 0.941      | C(26)-H(261) | 0.984    |
| C(8)-C(9)    | 1.399(4)   | C(27)-H(271) | 0.953    |
| C(8)-H(81)   | 0.933      | C(27)-H(272) | 0.958    |
| C(9)-C(10)   | 1.372(3)   | C(27)-H(273) | 0.969    |
| C(9)-H(91)   | 0.943      | C(28)-H(281) | 0.978    |
| C(10)-C(11)  | 1.426(3)   | C(28)-H(282) | 0.971    |
| C(10)-H(101) | 0.946      | C(28)-H(283) | 0.973    |
| C(11)-C(12)  | 1.431(3)   | C(29)-C(30)  | 1.354(3) |
| C(12)-C(13)  | 1.486(3)   | C(29)-C(42)  | 1.452(3) |
| C(13)-C(14)  | 1.432(3)   | C(30)-C(31)  | 1.429(3) |
| C(13)-C(22)  | 1.378(3)   | C(30)-H(301) | 0.950    |
| C(14)-C(15)  | 1.417(4)   | C(31)-C(32)  | 1.412(4) |
| C(14)-C(19)  | 1.427(3)   | C(31)-C(36)  | 1.410(3) |
| C(15)-C(16)  | 1.367(4)   | C(32)-C(33)  | 1.374(4) |
| C(15)-H(151) | 0.935      | C(32)-H(321) | 0.927    |
| C(16)-C(17)  | 1.400(4)   | C(33)-C(34)  | 1.393(4) |
| C(16)-H(161) | 0.953      | C(33)-H(331) | 0.935    |
| C(17)-C(18)  | 1.360(5)   | C(34)-C(35)  | 1.379(4) |
| C(17)-H(171) | 0.941      | C(34)-H(341) | 0.928    |
| C(18)-C(19)  | 1.421(4)   | C(35)-C(36)  | 1.412(4) |
| C(18)-H(181) | 0.944      | C(35)-H(351) | 0.961    |

|              |            |              |          |
|--------------|------------|--------------|----------|
| C(36)-C(37)  | 1.465(4)   | C(55)-C(56)  | 1.421(4) |
| C(37)-C(38)  | 1.404(3)   | C(55)-H(551) | 0.938    |
| C(37)-C(42)  | 1.414(4)   | C(56)-C(57)  | 1.420(4) |
| C(38)-C(39)  | 1.372(4)   | C(56)-C(61)  | 1.427(3) |
| C(38)-H(381) | 0.946      | C(57)-C(58)  | 1.364(5) |
| C(39)-C(40)  | 1.390(5)   | C(57)-H(571) | 0.938    |
| C(39)-H(391) | 0.924      | C(58)-C(59)  | 1.408(5) |
| C(40)-C(41)  | 1.379(4)   | C(58)-H(581) | 0.948    |
| C(40)-H(401) | 0.937      | C(59)-C(60)  | 1.376(4) |
| C(41)-C(42)  | 1.417(4)   | C(59)-H(591) | 0.945    |
| C(41)-H(411) | 0.932      | C(60)-C(61)  | 1.411(4) |
| C(43)-C(44)  | 1.381(4)   | C(60)-H(601) | 0.932    |
| C(43)-C(48)  | 1.394(4)   | C(61)-C(62)  | 1.439(3) |
| C(44)-C(45)  | 1.395(4)   | C(62)-C(63)  | 1.483(3) |
| C(44)-H(441) | 0.950      | C(63)-C(64)  | 1.439(3) |
| C(45)-C(46)  | 1.390(4)   | C(63)-C(72)  | 1.376(3) |
| C(45)-C(49)  | 1.499(4)   | C(64)-C(65)  | 1.416(3) |
| C(46)-C(47)  | 1.390(4)   | C(64)-C(69)  | 1.421(3) |
| C(46)-H(461) | 0.927      | C(65)-C(66)  | 1.371(3) |
| C(47)-C(48)  | 1.392(4)   | C(65)-H(651) | 0.925    |
| C(47)-C(50)  | 1.513(4)   | C(66)-C(67)  | 1.407(4) |
| C(48)-H(481) | 0.934      | C(66)-H(661) | 0.945    |
| C(49)-H(491) | 0.953      | C(67)-C(68)  | 1.356(4) |
| C(49)-H(492) | 0.953      | C(67)-H(671) | 0.936    |
| C(49)-H(493) | 0.948      | C(68)-C(69)  | 1.420(3) |
| C(50)-H(501) | 0.959      | C(68)-H(681) | 0.930    |
| C(50)-H(502) | 0.965      | C(69)-C(70)  | 1.414(4) |
| C(50)-H(503) | 0.972      | C(70)-C(71)  | 1.361(4) |
| P(51)-O(52)  | 1.6774(17) | C(70)-H(701) | 0.942    |
| P(51)-O(73)  | 1.6634(17) | C(71)-C(72)  | 1.412(3) |
| P(51)-N(74)  | 1.658(2)   | C(71)-H(711) | 0.935    |
| O(52)-C(53)  | 1.391(3)   | C(72)-O(73)  | 1.388(3) |
| C(53)-C(54)  | 1.403(3)   | N(74)-C(75)  | 1.473(3) |
| C(53)-C(62)  | 1.377(3)   | N(74)-C(76)  | 1.486(3) |
| C(54)-C(55)  | 1.365(4)   | C(75)-C(79)  | 1.524(3) |
| C(54)-H(541) | 0.942      | C(75)-C(93)  | 1.529(3) |

|              |          |                  |            |
|--------------|----------|------------------|------------|
| C(75)-H(751) | 0.997    | C(93)-C(98)      | 1.399(4)   |
| C(76)-C(77)  | 1.518(4) | C(94)-C(95)      | 1.390(4)   |
| C(76)-C(78)  | 1.522(4) | C(94)-H(941)     | 0.932      |
| C(76)-H(761) | 0.998    | C(95)-C(96)      | 1.392(5)   |
| C(77)-H(771) | 0.965    | C(95)-C(99)      | 1.506(5)   |
| C(77)-H(772) | 0.964    | C(96)-C(97)      | 1.380(5)   |
| C(77)-H(773) | 0.960    | C(96)-H(961)     | 0.936      |
| C(78)-H(781) | 0.969    | C(97)-C(98)      | 1.393(4)   |
| C(78)-H(782) | 0.966    | C(97)-C(100)     | 1.506(5)   |
| C(78)-H(783) | 0.980    | C(98)-H(981)     | 0.955      |
| C(79)-C(80)  | 1.349(3) | C(99)-H(991)     | 0.958      |
| C(79)-C(92)  | 1.452(3) | C(99)-H(992)     | 0.967      |
| C(80)-C(81)  | 1.432(3) | C(99)-H(993)     | 0.963      |
| C(80)-H(801) | 0.953    | C(100)-H(1001)   | 0.954      |
| C(81)-C(82)  | 1.409(4) | C(100)-H(1002)   | 0.954      |
| C(81)-C(86)  | 1.414(3) | C(100)-H(1003)   | 0.956      |
| C(82)-C(83)  | 1.376(4) | Cl(101)-C(102)   | 1.751(4)   |
| C(82)-H(821) | 0.931    | C(102)-Cl(103)   | 1.747(4)   |
| C(83)-C(84)  | 1.398(4) | C(102)-H(1021)   | 0.962      |
| C(83)-H(831) | 0.946    | C(102)-H(1022)   | 0.983      |
| C(84)-C(85)  | 1.374(4) |                  |            |
| C(84)-H(841) | 0.947    | O(2)-P(1)-O(23)  | 98.34(8)   |
| C(85)-C(86)  | 1.415(3) | O(2)-P(1)-N(24)  | 106.40(10) |
| C(85)-H(851) | 0.934    | O(23)-P(1)-N(24) | 97.13(10)  |
| C(86)-C(87)  | 1.452(3) | P(1)-O(2)-C(3)   | 125.72(15) |
| C(87)-C(88)  | 1.408(3) | O(2)-C(3)-C(4)   | 117.5(2)   |
| C(87)-C(92)  | 1.425(3) | O(2)-C(3)-C(12)  | 120.5(2)   |
| C(88)-C(89)  | 1.364(4) | C(4)-C(3)-C(12)  | 122.0(2)   |
| C(88)-H(881) | 0.936    | C(3)-C(4)-C(5)   | 119.7(2)   |
| C(89)-C(90)  | 1.400(4) | C(3)-C(4)-H(41)  | 120.3      |
| C(89)-H(891) | 0.943    | C(5)-C(4)-H(41)  | 120.0      |
| C(90)-C(91)  | 1.373(4) | C(4)-C(5)-C(6)   | 120.8(2)   |
| C(90)-H(901) | 0.947    | C(4)-C(5)-H(51)  | 119.5      |
| C(91)-C(92)  | 1.411(3) | C(6)-C(5)-H(51)  | 119.7      |
| C(91)-H(911) | 0.959    | C(5)-C(6)-C(7)   | 121.4(2)   |
| C(93)-C(94)  | 1.387(4) | C(5)-C(6)-C(11)  | 119.4(2)   |



|                    |          |                     |            |
|--------------------|----------|---------------------|------------|
| C(7)-C(6)-C(11)    | 119.2(2) | C(19)-C(18)-H(181)  | 120.1      |
| C(6)-C(7)-C(8)     | 121.1(2) | C(14)-C(19)-C(18)   | 118.9(2)   |
| C(6)-C(7)-H(71)    | 118.5    | C(14)-C(19)-C(20)   | 119.4(2)   |
| C(8)-C(7)-H(71)    | 120.4    | C(18)-C(19)-C(20)   | 121.7(2)   |
| C(7)-C(8)-C(9)     | 120.4(3) | C(19)-C(20)-C(21)   | 120.8(2)   |
| C(7)-C(8)-H(81)    | 120.1    | C(19)-C(20)-H(201)  | 118.9      |
| C(9)-C(8)-H(81)    | 119.5    | C(21)-C(20)-H(201)  | 120.4      |
| C(8)-C(9)-C(10)    | 120.3(3) | C(20)-C(21)-C(22)   | 119.7(2)   |
| C(8)-C(9)-H(91)    | 120.1    | C(20)-C(21)-H(211)  | 120.7      |
| C(10)-C(9)-H(91)   | 119.7    | C(22)-C(21)-H(211)  | 119.6      |
| C(9)-C(10)-C(11)   | 121.0(2) | C(21)-C(22)-C(13)   | 122.2(2)   |
| C(9)-C(10)-H(101)  | 119.7    | C(21)-C(22)-O(23)   | 118.6(2)   |
| C(11)-C(10)-H(101) | 119.3    | C(13)-C(22)-O(23)   | 119.2(2)   |
| C(10)-C(11)-C(6)   | 118.0(2) | C(22)-O(23)-P(1)    | 113.14(15) |
| C(10)-C(11)-C(12)  | 122.3(2) | P(1)-N(24)-C(25)    | 119.49(16) |
| C(6)-C(11)-C(12)   | 119.6(2) | P(1)-N(24)-C(26)    | 122.58(16) |
| C(11)-C(12)-C(3)   | 118.1(2) | C(25)-N(24)-C(26)   | 117.90(19) |
| C(11)-C(12)-C(13)  | 122.0(2) | N(24)-C(25)-C(29)   | 113.64(19) |
| C(3)-C(12)-C(13)   | 119.8(2) | N(24)-C(25)-C(43)   | 111.57(19) |
| C(12)-C(13)-C(14)  | 122.6(2) | C(29)-C(25)-C(43)   | 112.1(2)   |
| C(12)-C(13)-C(22)  | 118.9(2) | N(24)-C(25)-H(251)  | 106.0      |
| C(14)-C(13)-C(22)  | 118.4(2) | C(29)-C(25)-H(251)  | 106.9      |
| C(13)-C(14)-C(15)  | 122.6(2) | C(43)-C(25)-H(251)  | 105.9      |
| C(13)-C(14)-C(19)  | 119.1(2) | N(24)-C(26)-C(27)   | 112.8(2)   |
| C(15)-C(14)-C(19)  | 118.2(2) | N(24)-C(26)-C(28)   | 111.9(2)   |
| C(14)-C(15)-C(16)  | 120.9(2) | C(27)-C(26)-C(28)   | 110.6(3)   |
| C(14)-C(15)-H(151) | 119.0    | N(24)-C(26)-H(261)  | 105.5      |
| C(16)-C(15)-H(151) | 120.0    | C(27)-C(26)-H(261)  | 107.7      |
| C(15)-C(16)-C(17)  | 120.8(3) | C(28)-C(26)-H(261)  | 108.0      |
| C(15)-C(16)-H(161) | 118.5    | C(26)-C(27)-H(271)  | 109.8      |
| C(17)-C(16)-H(161) | 120.8    | C(26)-C(27)-H(272)  | 111.0      |
| C(16)-C(17)-C(18)  | 120.2(2) | H(271)-C(27)-H(272) | 109.5      |
| C(16)-C(17)-H(171) | 120.0    | C(26)-C(27)-H(273)  | 106.9      |
| C(18)-C(17)-H(171) | 119.7    | H(271)-C(27)-H(273) | 109.9      |
| C(17)-C(18)-C(19)  | 120.9(2) | H(272)-C(27)-H(273) | 109.7      |
| C(17)-C(18)-H(181) | 119.0    | C(26)-C(28)-H(281)  | 108.3      |

|                     |          |                     |          |
|---------------------|----------|---------------------|----------|
| C(26)-C(28)-H(282)  | 109.0    | C(38)-C(39)-H(391)  | 119.7    |
| H(281)-C(28)-H(282) | 110.1    | C(40)-C(39)-H(391)  | 120.3    |
| C(26)-C(28)-H(283)  | 109.4    | C(39)-C(40)-C(41)   | 120.0(3) |
| H(281)-C(28)-H(283) | 109.2    | C(39)-C(40)-H(401)  | 121.2    |
| H(282)-C(28)-H(283) | 110.9    | C(41)-C(40)-H(401)  | 118.8    |
| C(25)-C(29)-C(30)   | 121.5(2) | C(40)-C(41)-C(42)   | 121.1(3) |
| C(25)-C(29)-C(42)   | 119.3(2) | C(40)-C(41)-H(411)  | 119.8    |
| C(30)-C(29)-C(42)   | 119.2(2) | C(42)-C(41)-H(411)  | 119.2    |
| C(29)-C(30)-C(31)   | 122.5(2) | C(29)-C(42)-C(41)   | 121.5(2) |
| C(29)-C(30)-H(301)  | 119.3    | C(29)-C(42)-C(37)   | 120.1(2) |
| C(31)-C(30)-H(301)  | 118.1    | C(41)-C(42)-C(37)   | 118.4(2) |
| C(30)-C(31)-C(32)   | 120.3(2) | C(25)-C(43)-C(44)   | 122.5(2) |
| C(30)-C(31)-C(36)   | 120.0(2) | C(25)-C(43)-C(48)   | 118.5(2) |
| C(32)-C(31)-C(36)   | 119.6(2) | C(44)-C(43)-C(48)   | 119.0(2) |
| C(31)-C(32)-C(33)   | 121.0(3) | C(43)-C(44)-C(45)   | 121.6(2) |
| C(31)-C(32)-H(321)  | 119.3    | C(43)-C(44)-H(441)  | 119.4    |
| C(33)-C(32)-H(321)  | 119.7    | C(45)-C(44)-H(441)  | 119.1    |
| C(32)-C(33)-C(34)   | 119.5(3) | C(44)-C(45)-C(46)   | 118.1(3) |
| C(32)-C(33)-H(331)  | 119.5    | C(44)-C(45)-C(49)   | 120.2(3) |
| C(34)-C(33)-H(331)  | 121.0    | C(46)-C(45)-C(49)   | 121.7(3) |
| C(33)-C(34)-C(35)   | 120.7(3) | C(45)-C(46)-C(47)   | 121.8(3) |
| C(33)-C(34)-H(341)  | 120.5    | C(45)-C(46)-H(461)  | 118.2    |
| C(35)-C(34)-H(341)  | 118.7    | C(47)-C(46)-H(461)  | 120.0    |
| C(34)-C(35)-C(36)   | 120.9(3) | C(46)-C(47)-C(48)   | 118.5(3) |
| C(34)-C(35)-H(351)  | 119.2    | C(46)-C(47)-C(50)   | 121.3(3) |
| C(36)-C(35)-H(351)  | 119.8    | C(48)-C(47)-C(50)   | 120.1(3) |
| C(35)-C(36)-C(31)   | 118.2(2) | C(43)-C(48)-C(47)   | 120.9(3) |
| C(35)-C(36)-C(37)   | 123.3(2) | C(43)-C(48)-H(481)  | 117.5    |
| C(31)-C(36)-C(37)   | 118.5(2) | C(47)-C(48)-H(481)  | 121.5    |
| C(36)-C(37)-C(38)   | 121.5(2) | C(45)-C(49)-H(491)  | 109.5    |
| C(36)-C(37)-C(42)   | 119.4(2) | C(45)-C(49)-H(492)  | 109.4    |
| C(38)-C(37)-C(42)   | 119.0(2) | H(491)-C(49)-H(492) | 107.5    |
| C(37)-C(38)-C(39)   | 121.5(3) | C(45)-C(49)-H(493)  | 113.5    |
| C(37)-C(38)-H(381)  | 117.4    | H(491)-C(49)-H(493) | 109.0    |
| C(39)-C(38)-H(381)  | 121.1    | H(492)-C(49)-H(493) | 107.7    |
| C(38)-C(39)-C(40)   | 120.1(2) | C(47)-C(50)-H(501)  | 111.2    |

|                     |            |                    |            |
|---------------------|------------|--------------------|------------|
| C(47)-C(50)-H(502)  | 111.9      | C(61)-C(62)-C(53)  | 118.1(2)   |
| H(501)-C(50)-H(502) | 108.5      | C(61)-C(62)-C(63)  | 122.7(2)   |
| C(47)-C(50)-H(503)  | 112.5      | C(53)-C(62)-C(63)  | 119.1(2)   |
| H(501)-C(50)-H(503) | 105.8      | C(62)-C(63)-C(64)  | 121.8(2)   |
| H(502)-C(50)-H(503) | 106.8      | C(62)-C(63)-C(72)  | 119.8(2)   |
| O(52)-P(51)-O(73)   | 97.85(8)   | C(64)-C(63)-C(72)  | 118.3(2)   |
| O(52)-P(51)-N(74)   | 97.64(9)   | C(63)-C(64)-C(65)  | 122.5(2)   |
| O(73)-P(51)-N(74)   | 106.31(10) | C(63)-C(64)-C(69)  | 119.2(2)   |
| P(51)-O(52)-C(53)   | 110.92(14) | C(65)-C(64)-C(69)  | 118.2(2)   |
| O(52)-C(53)-C(54)   | 118.0(2)   | C(64)-C(65)-C(66)  | 121.2(2)   |
| O(52)-C(53)-C(62)   | 119.1(2)   | C(64)-C(65)-H(651) | 118.0      |
| C(54)-C(53)-C(62)   | 122.9(2)   | C(66)-C(65)-H(651) | 120.8      |
| C(53)-C(54)-C(55)   | 119.6(2)   | C(65)-C(66)-C(67)  | 120.1(2)   |
| C(53)-C(54)-H(541)  | 120.2      | C(65)-C(66)-H(661) | 119.9      |
| C(55)-C(54)-H(541)  | 120.1      | C(67)-C(66)-H(661) | 120.0      |
| C(54)-C(55)-C(56)   | 120.7(2)   | C(66)-C(67)-C(68)  | 120.2(2)   |
| C(54)-C(55)-H(551)  | 119.1      | C(66)-C(67)-H(671) | 119.7      |
| C(56)-C(55)-H(551)  | 120.2      | C(68)-C(67)-H(671) | 120.1      |
| C(55)-C(56)-C(57)   | 121.1(2)   | C(67)-C(68)-C(69)  | 121.2(2)   |
| C(55)-C(56)-C(61)   | 119.5(2)   | C(67)-C(68)-H(681) | 118.9      |
| C(57)-C(56)-C(61)   | 119.4(3)   | C(69)-C(68)-H(681) | 119.9      |
| C(56)-C(57)-C(58)   | 120.6(3)   | C(64)-C(69)-C(68)  | 118.9(2)   |
| C(56)-C(57)-H(571)  | 118.2      | C(64)-C(69)-C(70)  | 119.6(2)   |
| C(58)-C(57)-H(571)  | 121.1      | C(68)-C(69)-C(70)  | 121.5(2)   |
| C(57)-C(58)-C(59)   | 120.1(3)   | C(69)-C(70)-C(71)  | 120.8(2)   |
| C(57)-C(58)-H(581)  | 119.6      | C(69)-C(70)-H(701) | 120.3      |
| C(59)-C(58)-H(581)  | 120.3      | C(71)-C(70)-H(701) | 118.9      |
| C(58)-C(59)-C(60)   | 120.7(3)   | C(70)-C(71)-C(72)  | 119.7(2)   |
| C(58)-C(59)-H(591)  | 120.3      | C(70)-C(71)-H(711) | 121.3      |
| C(60)-C(59)-H(591)  | 119.0      | C(72)-C(71)-H(711) | 118.9      |
| C(59)-C(60)-C(61)   | 120.8(3)   | C(71)-C(72)-C(63)  | 122.1(2)   |
| C(59)-C(60)-H(601)  | 121.6      | C(71)-C(72)-O(73)  | 116.8(2)   |
| C(61)-C(60)-H(601)  | 117.6      | C(63)-C(72)-O(73)  | 120.9(2)   |
| C(56)-C(61)-C(60)   | 118.3(2)   | C(72)-O(73)-P(51)  | 125.98(15) |
| C(56)-C(61)-C(62)   | 119.1(2)   | P(51)-N(74)-C(75)  | 119.07(16) |
| C(60)-C(61)-C(62)   | 122.5(2)   | P(51)-N(74)-C(76)  | 122.68(16) |

|                     |            |                    |          |
|---------------------|------------|--------------------|----------|
| C(75)-N(74)-C(76)   | 118.18(19) | C(83)-C(82)-H(821) | 120.2    |
| N(74)-C(75)-C(79)   | 114.20(19) | C(82)-C(83)-C(84)  | 119.6(2) |
| N(74)-C(75)-C(93)   | 111.22(19) | C(82)-C(83)-H(831) | 120.2    |
| C(79)-C(75)-C(93)   | 111.57(19) | C(84)-C(83)-H(831) | 120.2    |
| N(74)-C(75)-H(751)  | 105.1      | C(83)-C(84)-C(85)  | 120.8(2) |
| C(79)-C(75)-H(751)  | 106.3      | C(83)-C(84)-H(841) | 121.3    |
| C(93)-C(75)-H(751)  | 107.9      | C(85)-C(84)-H(841) | 117.9    |
| N(74)-C(76)-C(77)   | 111.9(2)   | C(84)-C(85)-C(86)  | 120.8(2) |
| N(74)-C(76)-C(78)   | 111.9(2)   | C(84)-C(85)-H(851) | 120.1    |
| C(77)-C(76)-C(78)   | 111.8(3)   | C(86)-C(85)-H(851) | 119.2    |
| N(74)-C(76)-H(761)  | 106.0      | C(85)-C(86)-C(81)  | 118.3(2) |
| C(77)-C(76)-H(761)  | 108.0      | C(85)-C(86)-C(87)  | 122.6(2) |
| C(78)-C(76)-H(761)  | 106.8      | C(81)-C(86)-C(87)  | 119.0(2) |
| C(76)-C(77)-H(771)  | 107.7      | C(86)-C(87)-C(88)  | 121.8(2) |
| C(76)-C(77)-H(772)  | 109.5      | C(86)-C(87)-C(92)  | 119.6(2) |
| H(771)-C(77)-H(772) | 111.1      | C(88)-C(87)-C(92)  | 118.5(2) |
| C(76)-C(77)-H(773)  | 108.7      | C(87)-C(88)-C(89)  | 121.9(2) |
| H(771)-C(77)-H(773) | 109.8      | C(87)-C(88)-H(881) | 118.8    |
| H(772)-C(77)-H(773) | 109.9      | C(89)-C(88)-H(881) | 119.3    |
| C(76)-C(78)-H(781)  | 109.8      | C(88)-C(89)-C(90)  | 119.6(2) |
| C(76)-C(78)-H(782)  | 110.1      | C(88)-C(89)-H(891) | 120.1    |
| H(781)-C(78)-H(782) | 109.2      | C(90)-C(89)-H(891) | 120.3    |
| C(76)-C(78)-H(783)  | 108.5      | C(89)-C(90)-C(91)  | 120.2(3) |
| H(781)-C(78)-H(783) | 108.6      | C(89)-C(90)-H(901) | 119.3    |
| H(782)-C(78)-H(783) | 110.6      | C(91)-C(90)-H(901) | 120.5    |
| C(75)-C(79)-C(80)   | 122.0(2)   | C(90)-C(91)-C(92)  | 121.4(3) |
| C(75)-C(79)-C(92)   | 118.6(2)   | C(90)-C(91)-H(911) | 119.7    |
| C(80)-C(79)-C(92)   | 119.3(2)   | C(92)-C(91)-H(911) | 118.9    |
| C(79)-C(80)-C(81)   | 123.0(2)   | C(79)-C(92)-C(87)  | 119.6(2) |
| C(79)-C(80)-H(801)  | 119.5      | C(79)-C(92)-C(91)  | 122.1(2) |
| C(81)-C(80)-H(801)  | 117.5      | C(87)-C(92)-C(91)  | 118.2(2) |
| C(80)-C(81)-C(82)   | 121.1(2)   | C(75)-C(93)-C(94)  | 122.2(2) |
| C(80)-C(81)-C(86)   | 119.3(2)   | C(75)-C(93)-C(98)  | 118.9(2) |
| C(82)-C(81)-C(86)   | 119.7(2)   | C(94)-C(93)-C(98)  | 118.8(2) |
| C(81)-C(82)-C(83)   | 120.9(2)   | C(93)-C(94)-C(95)  | 121.5(3) |
| C(81)-C(82)-H(821)  | 118.9      | C(93)-C(94)-H(941) | 120.1    |

|                     |          |                        |          |
|---------------------|----------|------------------------|----------|
| C(95)-C(94)-H(941)  | 118.3    | C(95)-C(99)-H(993)     | 111.3    |
| C(94)-C(95)-C(96)   | 118.1(3) | H(991)-C(99)-H(993)    | 110.1    |
| C(94)-C(95)-C(99)   | 120.3(3) | H(992)-C(99)-H(993)    | 105.8    |
| C(96)-C(95)-C(99)   | 121.6(3) | C(97)-C(100)-H(1001)   | 112.1    |
| C(95)-C(96)-C(97)   | 122.0(3) | C(97)-C(100)-H(1002)   | 110.0    |
| C(95)-C(96)-H(961)  | 119.6    | H(1001)-C(100)-H(1002) | 107.0    |
| C(97)-C(96)-H(961)  | 118.4    | C(97)-C(100)-H(1003)   | 112.9    |
| C(96)-C(97)-C(98)   | 118.8(3) | H(1001)-C(100)-H(1003) | 107.0    |
| C(96)-C(97)-C(100)  | 121.2(3) | H(1002)-C(100)-H(1003) | 107.6    |
| C(98)-C(97)-C(100)  | 120.0(3) | Cl(101)-C(102)-Cl(103) | 112.7(2) |
| C(93)-C(98)-C(97)   | 120.6(3) | Cl(101)-C(102)-H(1021) | 108.9    |
| C(93)-C(98)-H(981)  | 119.6    | Cl(103)-C(102)-H(1021) | 109.7    |
| C(97)-C(98)-H(981)  | 119.7    | Cl(101)-C(102)-H(1022) | 107.5    |
| C(95)-C(99)-H(991)  | 111.5    | Cl(103)-C(102)-H(1022) | 108.4    |
| C(95)-C(99)-H(992)  | 110.4    | H(1021)-C(102)-H(1022) | 109.7    |
| H(991)-C(99)-H(992) | 107.5    |                        |          |

---

Symmetry transformations used to generate equivalent atoms:

Table 4. Anisotropic displacement parameters ( $\text{\AA}^2 \times 10^3$ ) for 6791. The anisotropic displacement factor exponent takes the form:  $-2\pi^2[ h^2 a^{*2}U^{11} + \dots + 2 h k a^* b^* U^{12} ]$

|       | $U^{11}$ | $U^{22}$ | $U^{33}$ | $U^{23}$ | $U^{13}$ | $U^{12}$ |
|-------|----------|----------|----------|----------|----------|----------|
| P(1)  | 20(1)    | 22(1)    | 21(1)    | -2(1)    | 6(1)     | -1(1)    |
| O(2)  | 21(1)    | 20(1)    | 30(1)    | -4(1)    | 8(1)     | 0(1)     |
| C(3)  | 22(1)    | 18(1)    | 22(1)    | -3(1)    | 4(1)     | -2(1)    |
| C(4)  | 26(1)    | 19(1)    | 27(1)    | 2(1)     | -1(1)    | 2(1)     |
| C(5)  | 36(1)    | 25(1)    | 20(1)    | 8(1)     | 2(1)     | -3(1)    |
| C(6)  | 31(1)    | 25(1)    | 21(1)    | -2(1)    | 7(1)     | -8(1)    |
| C(7)  | 45(2)    | 34(1)    | 23(1)    | 3(1)     | 13(1)    | -6(1)    |
| C(8)  | 40(1)    | 44(2)    | 31(1)    | -2(1)    | 20(1)    | -9(1)    |
| C(9)  | 28(1)    | 39(2)    | 30(1)    | -3(1)    | 12(1)    | -1(1)    |
| C(10) | 25(1)    | 30(1)    | 20(1)    | 2(1)     | 6(1)     | -1(1)    |
| C(11) | 24(1)    | 21(1)    | 17(1)    | -2(1)    | 4(1)     | -4(1)    |
| C(12) | 22(1)    | 17(1)    | 20(1)    | -1(1)    | 4(1)     | -1(1)    |
| C(13) | 19(1)    | 21(1)    | 19(1)    | 0(1)     | 7(1)     | 2(1)     |
| C(14) | 22(1)    | 26(1)    | 19(1)    | -1(1)    | 5(1)     | 6(1)     |
| C(15) | 24(1)    | 32(1)    | 23(1)    | 0(1)     | 3(1)     | 1(1)     |
| C(16) | 28(1)    | 39(2)    | 31(1)    | -6(1)    | 2(1)     | -3(1)    |
| C(17) | 31(1)    | 49(2)    | 26(1)    | -3(1)    | -4(1)    | 5(1)     |
| C(18) | 34(1)    | 45(2)    | 19(1)    | 3(1)     | 2(1)     | 11(1)    |
| C(19) | 26(1)    | 34(1)    | 19(1)    | 4(1)     | 8(1)     | 11(1)    |
| C(20) | 32(1)    | 38(1)    | 21(1)    | 10(1)    | 11(1)    | 10(1)    |
| C(21) | 29(1)    | 27(1)    | 31(1)    | 7(1)     | 16(1)    | 4(1)     |
| C(22) | 21(1)    | 23(1)    | 23(1)    | 1(1)     | 8(1)     | 5(1)     |
| O(23) | 22(1)    | 21(1)    | 26(1)    | 0(1)     | 7(1)     | -1(1)    |
| N(24) | 23(1)    | 24(1)    | 24(1)    | -1(1)    | 8(1)     | -4(1)    |
| C(25) | 22(1)    | 24(1)    | 24(1)    | 1(1)     | 6(1)     | 1(1)     |
| C(26) | 31(1)    | 34(1)    | 23(1)    | -9(1)    | 11(1)    | -11(1)   |
| C(27) | 73(2)    | 44(2)    | 62(2)    | -28(2)   | 46(2)    | -23(2)   |
| C(28) | 41(2)    | 73(2)    | 23(1)    | 5(1)     | 6(1)     | -12(2)   |
| C(29) | 21(1)    | 26(1)    | 22(1)    | -3(1)    | 8(1)     | 0(1)     |
| C(30) | 21(1)    | 26(1)    | 27(1)    | -3(1)    | 7(1)     | -2(1)    |
| C(31) | 28(1)    | 24(1)    | 27(1)    | -2(1)    | 14(1)    | -1(1)    |

|       |       |       |       |        |       |        |
|-------|-------|-------|-------|--------|-------|--------|
| C(32) | 32(1) | 29(1) | 34(1) | 1(1)   | 17(1) | 3(1)   |
| C(33) | 45(2) | 29(1) | 39(1) | 5(1)   | 25(1) | 9(1)   |
| C(34) | 54(2) | 24(1) | 50(2) | -2(1)  | 35(2) | -3(1)  |
| C(35) | 41(1) | 25(1) | 39(1) | -9(1)  | 23(1) | -8(1)  |
| C(36) | 32(1) | 26(1) | 26(1) | -7(1)  | 16(1) | -5(1)  |
| C(37) | 28(1) | 31(1) | 22(1) | -8(1)  | 13(1) | -6(1)  |
| C(38) | 31(1) | 39(2) | 30(1) | -11(1) | 13(1) | -14(1) |
| C(39) | 22(1) | 56(2) | 31(1) | -14(1) | 9(1)  | -13(1) |
| C(40) | 21(1) | 54(2) | 26(1) | -9(1)  | 4(1)  | 0(1)   |
| C(41) | 24(1) | 36(1) | 25(1) | -5(1)  | 5(1)  | 0(1)   |
| C(42) | 22(1) | 28(1) | 22(1) | -7(1)  | 8(1)  | -3(1)  |
| C(43) | 18(1) | 26(1) | 28(1) | -2(1)  | 3(1)  | 2(1)   |
| C(44) | 23(1) | 26(1) | 30(1) | -3(1)  | 6(1)  | -2(1)  |
| C(45) | 23(1) | 34(1) | 30(1) | -7(1)  | 5(1)  | -2(1)  |
| C(46) | 29(1) | 28(1) | 38(1) | -11(1) | 7(1)  | 4(1)   |
| C(47) | 29(1) | 26(1) | 35(1) | -2(1)  | 2(1)  | 3(1)   |
| C(48) | 28(1) | 25(1) | 34(1) | 2(1)   | 7(1)  | 1(1)   |
| C(49) | 39(1) | 44(2) | 36(1) | -10(1) | 18(1) | -2(1)  |
| C(50) | 55(2) | 26(2) | 56(2) | -2(1)  | 12(2) | 2(1)   |
| P(51) | 19(1) | 22(1) | 19(1) | 0(1)   | 6(1)  | 1(1)   |
| O(52) | 21(1) | 22(1) | 23(1) | 1(1)   | 7(1)  | 2(1)   |
| C(53) | 22(1) | 23(1) | 20(1) | -1(1)  | 7(1)  | -4(1)  |
| C(54) | 26(1) | 32(1) | 21(1) | 5(1)   | 3(1)  | -4(1)  |
| C(55) | 27(1) | 43(2) | 20(1) | 2(1)   | 7(1)  | -13(1) |
| C(56) | 26(1) | 38(1) | 20(1) | -8(1)  | 9(1)  | -10(1) |
| C(57) | 36(1) | 47(2) | 31(1) | -11(1) | 20(1) | -12(1) |
| C(58) | 37(2) | 44(2) | 53(2) | -17(1) | 28(1) | -6(1)  |
| C(59) | 32(1) | 35(2) | 52(2) | -9(1)  | 19(1) | 3(1)   |
| C(60) | 27(1) | 28(1) | 35(1) | -5(1)  | 13(1) | -1(1)  |
| C(61) | 20(1) | 27(1) | 21(1) | -6(1)  | 7(1)  | -6(1)  |
| C(62) | 19(1) | 21(1) | 19(1) | -2(1)  | 5(1)  | -2(1)  |
| C(63) | 23(1) | 17(1) | 20(1) | 0(1)   | 8(1)  | 1(1)   |
| C(64) | 23(1) | 19(1) | 22(1) | 1(1)   | 7(1)  | 3(1)   |
| C(65) | 25(1) | 25(1) | 22(1) | 0(1)   | 8(1)  | -1(1)  |
| C(66) | 26(1) | 34(1) | 28(1) | -2(1)  | 2(1)  | -3(1)  |
| C(67) | 35(1) | 47(2) | 22(1) | 3(1)   | 1(1)  | 0(1)   |
| C(68) | 41(2) | 37(1) | 22(1) | 4(1)   | 12(1) | 0(1)   |

|         |       |       |        |        |       |        |
|---------|-------|-------|--------|--------|-------|--------|
| C(69)   | 30(1) | 22(1) | 21(1)  | 1(1)   | 10(1) | 1(1)   |
| C(70)   | 34(1) | 25(1) | 27(1)  | 5(1)   | 16(1) | 1(1)   |
| C(71)   | 26(1) | 21(1) | 29(1)  | 0(1)   | 13(1) | -2(1)  |
| C(72)   | 25(1) | 16(1) | 21(1)  | 0(1)   | 8(1)  | 2(1)   |
| O(73)   | 18(1) | 21(1) | 26(1)  | -2(1)  | 5(1)  | -1(1)  |
| N(74)   | 22(1) | 24(1) | 20(1)  | 2(1)   | 6(1)  | 4(1)   |
| C(75)   | 18(1) | 23(1) | 26(1)  | 3(1)   | 7(1)  | 1(1)   |
| C(76)   | 28(1) | 36(1) | 21(1)  | -2(1)  | 7(1)  | 8(1)   |
| C(77)   | 63(2) | 44(2) | 30(1)  | -15(1) | -1(1) | 21(2)  |
| C(78)   | 41(2) | 83(3) | 34(1)  | 13(2)  | 20(1) | 7(2)   |
| C(79)   | 21(1) | 22(1) | 23(1)  | 1(1)   | 5(1)  | 3(1)   |
| C(80)   | 19(1) | 26(1) | 25(1)  | 0(1)   | 6(1)  | 1(1)   |
| C(81)   | 26(1) | 24(1) | 18(1)  | -1(1)  | 6(1)  | -1(1)  |
| C(82)   | 25(1) | 31(1) | 29(1)  | 4(1)   | 5(1)  | -3(1)  |
| C(83)   | 34(1) | 27(1) | 26(1)  | 2(1)   | 5(1)  | -10(1) |
| C(84)   | 43(1) | 19(1) | 23(1)  | 2(1)   | 6(1)  | -2(1)  |
| C(85)   | 37(1) | 22(1) | 21(1)  | -1(1)  | 7(1)  | 4(1)   |
| C(86)   | 28(1) | 23(1) | 15(1)  | -3(1)  | 3(1)  | 1(1)   |
| C(87)   | 24(1) | 24(1) | 17(1)  | -2(1)  | 6(1)  | 4(1)   |
| C(88)   | 31(1) | 28(1) | 26(1)  | 2(1)   | 10(1) | 9(1)   |
| C(89)   | 24(1) | 41(2) | 39(1)  | 1(1)   | 11(1) | 10(1)  |
| C(90)   | 22(1) | 40(2) | 38(1)  | 1(1)   | 13(1) | -1(1)  |
| C(91)   | 25(1) | 32(1) | 32(1)  | 4(1)   | 12(1) | 1(1)   |
| C(92)   | 20(1) | 23(1) | 20(1)  | -1(1)  | 5(1)  | 2(1)   |
| C(93)   | 15(1) | 24(1) | 37(1)  | 1(1)   | 5(1)  | 1(1)   |
| C(94)   | 24(1) | 27(1) | 33(1)  | -2(1)  | 6(1)  | 1(1)   |
| C(95)   | 20(1) | 38(2) | 40(1)  | -11(1) | 2(1)  | 4(1)   |
| C(96)   | 21(1) | 36(2) | 54(2)  | -19(1) | 0(1)  | 0(1)   |
| C(97)   | 24(1) | 24(1) | 68(2)  | -4(1)  | 6(1)  | -1(1)  |
| C(98)   | 24(1) | 26(1) | 47(2)  | 4(1)   | 8(1)  | 1(1)   |
| C(99)   | 43(2) | 57(2) | 36(2)  | -14(2) | 2(1)  | 5(2)   |
| C(100)  | 61(2) | 26(2) | 102(3) | -6(2)  | 18(2) | -6(2)  |
| Cl(101) | 49(1) | 66(1) | 55(1)  | 8(1)   | 15(1) | 21(1)  |
| C(102)  | 44(2) | 70(3) | 87(3)  | -30(2) | 14(2) | 2(2)   |
| Cl(103) | 84(1) | 56(1) | 52(1)  | -3(1)  | 25(1) | -24(1) |

---



Table 5. Hydrogen coordinates ( $\times 10^4$ ) and isotropic displacement parameters ( $\text{\AA}^2 \times 10^{-3}$ ) for 6791.

|        | x     | y    | z    | U(eq) |
|--------|-------|------|------|-------|
| H(41)  | 4259  | 3557 | 7767 | 31    |
| H(51)  | 3119  | 3473 | 8526 | 34    |
| H(71)  | 1521  | 3854 | 8732 | 40    |
| H(81)  | -11   | 4471 | 8190 | 44    |
| H(91)  | -490  | 5099 | 6780 | 39    |
| H(101) | 548   | 5086 | 5892 | 30    |
| H(151) | 828   | 3770 | 5073 | 33    |
| H(161) | -560  | 3484 | 3774 | 42    |
| H(171) | -1006 | 4217 | 2431 | 47    |
| H(181) | -47   | 5204 | 2404 | 42    |
| H(201) | 1473  | 5975 | 3183 | 36    |
| H(211) | 2949  | 6223 | 4458 | 33    |
| H(251) | 6924  | 5248 | 7927 | 28    |
| H(261) | 4373  | 5235 | 7728 | 34    |
| H(271) | 4835  | 6438 | 7799 | 79    |
| H(272) | 5917  | 6272 | 8538 | 80    |
| H(273) | 4928  | 6146 | 8792 | 80    |
| H(281) | 5634  | 4366 | 8490 | 71    |
| H(282) | 6390  | 4998 | 9019 | 71    |
| H(283) | 5351  | 4855 | 9215 | 70    |
| H(301) | 5372  | 6462 | 6292 | 30    |
| H(321) | 4870  | 7616 | 5532 | 36    |
| H(331) | 5218  | 8781 | 5274 | 42    |
| H(341) | 6845  | 9258 | 6110 | 45    |
| H(351) | 8117  | 8568 | 7129 | 38    |
| H(381) | 9222  | 7871 | 7931 | 39    |
| H(391) | 10496 | 7081 | 8779 | 44    |
| H(401) | 10127 | 5862 | 8841 | 42    |
| H(411) | 8466  | 5470 | 8164 | 34    |
| H(441) | 7236  | 5639 | 5848 | 33    |

|        |       |       |       |    |
|--------|-------|-------|-------|----|
| H(461) | 7785  | 3632  | 5220  | 40 |
| H(481) | 6654  | 3992  | 7268  | 36 |
| H(491) | 8501  | 4660  | 4647  | 58 |
| H(492) | 8268  | 5424  | 4887  | 60 |
| H(493) | 7459  | 5016  | 4092  | 59 |
| H(501) | 7317  | 2767  | 7064  | 72 |
| H(502) | 7637  | 2613  | 6200  | 72 |
| H(503) | 6486  | 2669  | 6088  | 73 |
| H(541) | 2878  | 10128 | 9269  | 33 |
| H(551) | 1602  | 10517 | 9776  | 36 |
| H(571) | 177   | 11347 | 9637  | 42 |
| H(581) | -838  | 12319 | 8929  | 50 |
| H(591) | -498  | 12944 | 7725  | 46 |
| H(601) | 766   | 12532 | 7185  | 35 |
| H(651) | 317   | 11274 | 6272  | 28 |
| H(661) | -906  | 11349 | 4780  | 37 |
| H(671) | -488  | 11916 | 3594  | 46 |
| H(681) | 1100  | 12394 | 3902  | 41 |
| H(701) | 2872  | 12658 | 5018  | 33 |
| H(711) | 4111  | 12515 | 6480  | 29 |
| H(751) | 6669  | 10744 | 8030  | 27 |
| H(761) | 4112  | 10875 | 6658  | 32 |
| H(771) | 4558  | 9875  | 5985  | 74 |
| H(772) | 5541  | 9740  | 6898  | 75 |
| H(773) | 4429  | 9660  | 6934  | 75 |
| H(781) | 6095  | 10955 | 6544  | 76 |
| H(782) | 5498  | 11643 | 6668  | 76 |
| H(783) | 5040  | 11157 | 5751  | 76 |
| H(801) | 5103  | 9673  | 8819  | 29 |
| H(821) | 4566  | 8588  | 9400  | 36 |
| H(831) | 4858  | 7421  | 9953  | 36 |
| H(841) | 6476  | 6890  | 10202 | 37 |
| H(851) | 7715  | 7510  | 9862  | 34 |
| H(881) | 8866  | 8129  | 9697  | 34 |
| H(891) | 10165 | 8827  | 9567  | 40 |
| H(901) | 9846  | 10022 | 9096  | 39 |

|         |      |       |       |    |
|---------|------|-------|-------|----|
| H(911)  | 8209 | 10506 | 8736  | 35 |
| H(941)  | 6919 | 10503 | 10359 | 35 |
| H(961)  | 7643 | 12526 | 11203 | 48 |
| H(981)  | 6674 | 12062 | 8457  | 40 |
| H(991)  | 7610 | 11604 | 12350 | 73 |
| H(992)  | 8345 | 11044 | 12172 | 72 |
| H(993)  | 7227 | 10826 | 11998 | 72 |
| H(1001) | 6819 | 13485 | 9715  | 99 |
| H(1002) | 7973 | 13357 | 9964  | 99 |
| H(1003) | 7230 | 13260 | 8947  | 99 |
| H(1021) | 4201 | 8254  | 6845  | 85 |
| H(1022) | 4159 | 7738  | 7658  | 85 |

---

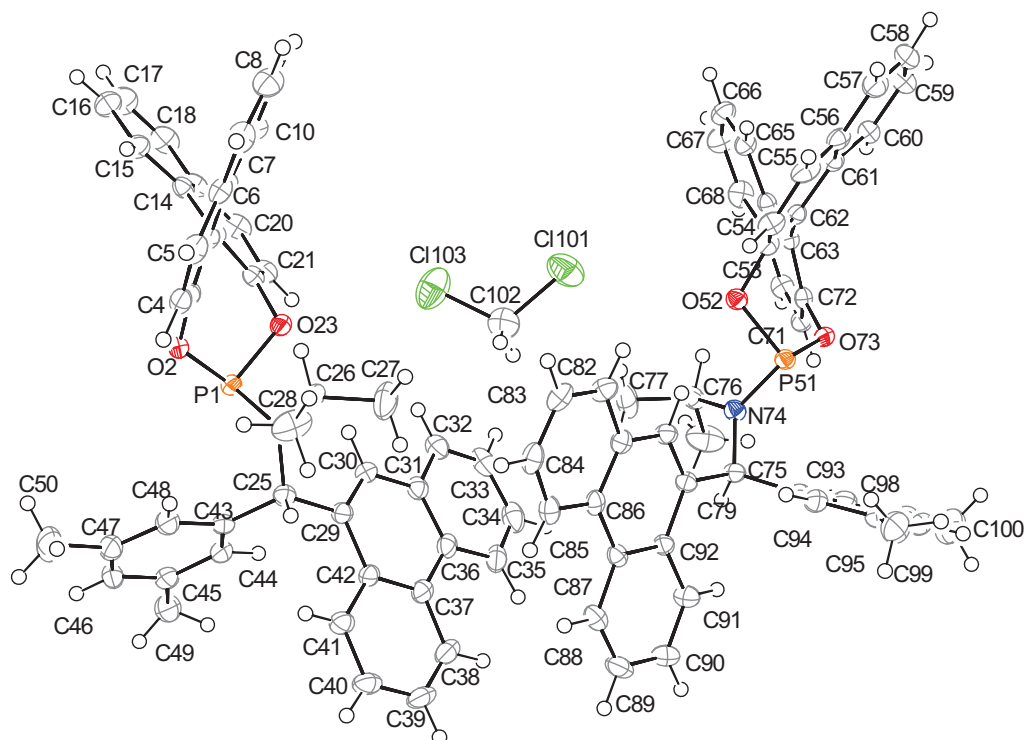

In the asymmetric unit there are two molecules. The numbering scheme for the second molecule is off-set with 50 compared to the first molecule. One solvent molecule is also found in the asymmetric unit.
